# Supplementary material for: Identification of Zip8-correlated hub genes in pulmonary hypertension by informatic analysis
Source: PeerJ. 2023 Aug 28;11:e15939. doi: 10.7717/peerj.15939 (PMC10470448; doi:10.7717/peerj.15939)
Supplement: Supplemental Information 4 [file peerj-11-15939-s004.xlsx]

## Sheet: 差异分析结果
	logFC	AveExpr	t	P.Value	adj.P.Val	B
LTBP1	0.522491	9.74464	8.60716	1.27185e-15	2.14549e-11	24.7176
GIMAP6	-0.452699	8.00683	-7.88929	1.2866e-13	1.08519e-09	20.3257
MIB1	0.268672	7.59116	7.75516	2.97722e-13	1.67409e-09	19.5281
SH3RF2	-0.386958	5.95899	-7.60354	7.61291e-13	2.91637e-09	18.6357
IL10RB	-0.269069	9.26265	-7.58289	8.64417e-13	2.91637e-09	18.515
SMARCC1	0.28624	8.84166	7.3203	4.27525e-12	1.20199e-08	16.9963
CSF3R	-0.541944	8.0815	-7.18861	9.41341e-12	2.2589e-08	16.2468
ARMCX3	0.230584	8.07224	7.16691	1.07127e-11	2.2589e-08	16.1241
RS1	-0.426867	5.01552	-7.06908	1.91291e-11	3.58543e-08	15.5738
GOLGA7	-0.217815	9.43923	-6.97175	3.38938e-11	5.71755e-08	15.031
PSD3	0.427092	7.60568	6.9381	4.12614e-11	6.32762e-08	14.8444
COL14A1	0.766398	8.91753	6.89854	5.1953e-11	7.30329e-08	14.6259
PDE4D	0.404018	8.38975	6.87932	5.80932e-11	7.53827e-08	14.5199
KCNIP3	-0.288878	5.60973	-6.74291	1.27613e-10	1.47634e-07	13.7738
KDM5B	0.23784	8.6778	6.73797	1.31277e-10	1.47634e-07	13.747
RAB5C	-0.194325	10.0914	-6.72445	1.41849e-10	1.49553e-07	13.6736
SLC6A9	-0.353439	6.20227	-6.68757	1.75124e-10	1.73775e-07	13.4738
MOB3A	-0.245696	8.40592	-6.61665	2.62077e-10	2.4561e-07	13.0918
SHKBP1	-0.279223	7.36552	-6.55643	3.68256e-10	3.05094e-07	12.7696
LUC7L	0.362757	8.5595	6.55574	3.69689e-10	3.05094e-07	12.766
ZNF720	0.285988	7.62558	6.55095	3.79807e-10	3.05094e-07	12.7404
LILRA2	-0.441647	5.39848	-6.51989	4.52243e-10	3.46768e-07	12.5751
NKD1	-0.380766	6.39581	-6.50961	4.7911e-10	3.51396e-07	12.5204
RIMKLA	-0.334383	6.47185	-6.44737	6.78448e-10	4.76864e-07	12.1911
TMEM26	-0.280167	4.64644	-6.41908	7.94088e-10	5.27216e-07	12.0421
NBAS	0.189587	8.45914	6.41493	8.12591e-10	5.27216e-07	12.0203
DEDD	-0.169082	7.98597	-6.38819	9.42528e-10	5.8887e-07	11.8799
DOCK1	0.216476	8.82952	6.37764	9.99215e-10	6.01991e-07	11.8246
ZBTB10	0.231907	6.49925	6.3517	1.15319e-09	6.58855e-07	11.689
FDPS	-0.256753	8.5481	-6.34656	1.18633e-09	6.58855e-07	11.6622
NECAP2	-0.215912	9.44054	-6.33481	1.26572e-09	6.58855e-07	11.6009
PDE3A	0.481292	7.29804	6.33258	1.28134e-09	6.58855e-07	11.5893
PDE7B	0.442858	6.42522	6.33152	1.28889e-09	6.58855e-07	11.5838
SLC9A8	-0.20605	7.67036	-6.29642	1.56315e-09	7.75551e-07	11.4013
DOLK	-0.221789	6.76461	-6.26542	1.85248e-09	8.77159e-07	11.2407
RC3H1	0.333495	8.81733	6.26351	1.87194e-09	8.77159e-07	11.2308
ZNF445	0.241978	6.57009	6.24988	2.01666e-09	9.19431e-07	11.1603
AQP1	-0.372753	11.278	-6.20838	2.52825e-09	1.12234e-06	10.9466
TMEM69	-0.204092	7.76778	-6.19914	2.65838e-09	1.14985e-06	10.8991
RHOG	-0.264716	8.77046	-6.17119	3.09336e-09	1.30455e-06	10.7559
RAB8A	-0.220132	8.09794	-6.1466	3.5333e-09	1.43044e-06	10.6302
TMEM138	-0.198617	7.90352	-6.14307	3.60116e-09	1.43044e-06	10.6122
TSHZ2	0.510543	6.9182	6.13681	3.72487e-09	1.43044e-06	10.5803
HBB	1.05158	10.4898	6.13258	3.8108e-09	1.43044e-06	10.5587
CDC25B	-0.314867	7.83724	-6.1267	3.93361e-09	1.43044e-06	10.5288
POSTN	0.907788	9.76497	6.12644	3.93907e-09	1.43044e-06	10.5275
LSS	-0.267505	8.0083	-6.12427	3.98545e-09	1.43044e-06	10.5164
FEM1B	0.203733	8.51118	6.12014	4.07501e-09	1.43211e-06	10.4954
NBEAL1	0.248398	10.0894	6.11337	4.2263e-09	1.45497e-06	10.4609
PCGF1	-0.189412	6.72641	-6.1003	4.53393e-09	1.52966e-06	10.3946
SP2	-0.223305	6.31595	-6.09595	4.64124e-09	1.53516e-06	10.3725
MUS81	-0.148756	7.86345	-6.08165	5.01115e-09	1.62564e-06	10.3
POLR2D	-0.202262	6.71962	-6.05433	5.80038e-09	1.84616e-06	10.1618
ATP5SL	-0.229732	8.36452	-6.02878	6.64815e-09	2.07681e-06	10.033
DHDDS	-0.201393	7.90684	-6.01148	7.28966e-09	2.23581e-06	9.94601
OR51B5	0.264762	4.22692	6.00427	7.57433e-09	2.28163e-06	9.90984
FCER1G	-0.359994	9.71747	-5.99853	7.80916e-09	2.3111e-06	9.88101
TNS3	-0.253413	8.47175	-5.98487	8.39626e-09	2.44201e-06	9.81257
CHAMP1	-0.249296	7.01235	-5.94014	1.06379e-08	3.02971e-06	9.58919
ZNF335	-0.143047	7.26001	-5.93769	1.07761e-08	3.02971e-06	9.577
PRKAG1	-0.188098	8.889	-5.93451	1.09584e-08	3.03044e-06	9.56117
FAM96A	-0.282739	8.08578	-5.92343	1.16172e-08	3.16082e-06	9.50607
S100A9	-0.701878	8.22204	-5.9193	1.18729e-08	3.17912e-06	9.48552
FBXL2	0.25784	7.02239	5.9093	1.25142e-08	3.28867e-06	9.43588
MAPK7	-0.176643	6.85949	-5.9064	1.27064e-08	3.28867e-06	9.4215
AMOTL2	-0.339227	7.89423	-5.90401	1.28669e-08	3.28867e-06	9.40965
NEK8	-0.141092	5.8277	-5.90053	1.31043e-08	3.29935e-06	9.3924
HTATIP2	-0.224017	7.86948	-5.89498	1.34916e-08	3.34692e-06	9.36492
ARF3	-0.176216	9.73806	-5.88998	1.38505e-08	3.38615e-06	9.34015
ARHGEF15	-0.276244	6.75974	-5.87335	1.51119e-08	3.64175e-06	9.25791
WDR33	0.241395	8.38839	5.85962	1.62374e-08	3.85786e-06	9.19015
SETD1A	-0.17493	6.72253	-5.85477	1.66547e-08	3.90205e-06	9.16621
CIDEB	-0.223688	6.21266	-5.83982	1.80062e-08	4.16092e-06	9.09261
MACC1	0.507096	8.30954	5.83168	1.87871e-08	4.2827e-06	9.05257
SLC3A2	-0.303771	9.23862	-5.8287	1.90804e-08	4.29157e-06	9.03796
NET1	0.34575	9.20939	5.82496	1.94565e-08	4.31857e-06	9.01955
RNASE2	-0.726741	5.58252	-5.81447	2.05475e-08	4.46508e-06	8.9681
CCRL2	-0.356824	6.42869	-5.81201	2.08122e-08	4.46508e-06	8.95603
HBA2	0.963019	10.799	5.8111	2.09106e-08	4.46508e-06	8.95158
MMAB	-0.193297	6.82778	-5.79972	2.21841e-08	4.60283e-06	8.89584
TBX3	-0.418002	7.52969	-5.79889	2.22795e-08	4.60283e-06	8.89179
ATAD2B	0.220122	7.90827	5.79736	2.24577e-08	4.60283e-06	8.88428
ZCCHC3	-0.174203	6.04975	-5.79574	2.26471e-08	4.60283e-06	8.87636
PLXNA1	-0.246066	7.60375	-5.77953	2.46326e-08	4.94675e-06	8.79713
NCF4	-0.336562	6.72224	-5.77198	2.56133e-08	5.08318e-06	8.76032
ADRA1A	-0.430954	4.80583	-5.7673	2.62419e-08	5.14737e-06	8.73746
C14orf37	0.240071	5.27874	5.76286	2.68502e-08	5.20617e-06	8.71586
MARK1	0.314479	6.41811	5.7575	2.76042e-08	5.29155e-06	8.68975
ADIPOR1	-0.198084	9.91164	-5.73667	3.07364e-08	5.79086e-06	8.58845
SLC4A7	0.366832	8.03579	5.73566	3.08956e-08	5.79086e-06	8.58358
MIER3	0.303844	6.97385	5.7292	3.19405e-08	5.92092e-06	8.55224
SFRP2	0.871446	8.40756	5.6945	3.81727e-08	6.9993e-06	8.38428
FUBP1	0.185256	9.72941	5.68607	3.98573e-08	7.15914e-06	8.34359
FUT1	-0.324583	6.49537	-5.6859	3.98932e-08	7.15914e-06	8.34274
CHD6	0.33333	8.12947	5.67817	4.15019e-08	7.36838e-06	8.3055
CLCN2	-0.165544	5.62567	-5.67615	4.19328e-08	7.36838e-06	8.29577
IL23A	-0.216846	5.74695	-5.66606	4.41522e-08	7.67838e-06	8.24719
TLE4	-0.198587	7.90274	-5.64955	4.80329e-08	8.26804e-06	8.16784
AGTR1	-0.431746	7.08633	-5.64303	4.96554e-08	8.46098e-06	8.13655
CLEC7A	-0.376232	6.82666	-5.63223	5.24608e-08	8.84961e-06	8.08479
B3GALNT1	-0.442952	7.29402	-5.62554	5.42765e-08	9.06524e-06	8.05275
CNOT6L	0.298443	8.97689	5.62108	5.55192e-08	9.1819e-06	8.03144
E2F4	-0.18647	7.87436	-5.60353	6.06922e-08	9.93997e-06	7.94756
ZNF638	0.257997	8.52819	5.5975	6.25723e-08	1.01493e-05	7.91884
RPS6KA5	0.267051	6.80234	5.59554	6.31964e-08	1.0153e-05	7.9095
KIAA0753	0.206285	7.75027	5.58937	6.52026e-08	1.02834e-05	7.88008
DNASE1L1	-0.171781	6.96999	-5.58929	6.52278e-08	1.02834e-05	7.87971
TSPAN7	-0.388128	9.79565	-5.58516	6.66063e-08	1.04035e-05	7.86003
CBX1	0.306307	7.542	5.56511	7.37039e-08	1.14065e-05	7.76472
NAP1L4	0.165242	8.45389	5.55601	7.71636e-08	1.18334e-05	7.72155
TNNT2	-0.316852	5.61897	-5.54576	8.12494e-08	1.21879e-05	7.67299
GTF3C2	-0.142841	8.32486	-5.54531	8.14354e-08	1.21879e-05	7.67084
GGA3	-0.173851	7.68457	-5.5448	8.16426e-08	1.21879e-05	7.66845
PLCB4	0.418273	7.27704	5.54194	8.28245e-08	1.22559e-05	7.65492
TSPYL1	-0.272301	6.57485	-5.53712	8.48586e-08	1.2352e-05	7.63209
LILRB2	-0.385869	7.57917	-5.53693	8.49388e-08	1.2352e-05	7.63121
DOCK3	0.215142	5.27184	5.52927	8.82713e-08	1.27269e-05	7.595
ARIH1	0.18056	9.30215	5.52345	9.0887e-08	1.2993e-05	7.56752
CUBN	0.299297	5.75607	5.51741	9.36821e-08	1.32563e-05	7.53902
RUFY3	0.282617	8.45997	5.5161	9.43004e-08	1.32563e-05	7.53284
TOR1A	-0.183733	7.89198	-5.5108	9.68395e-08	1.35007e-05	7.50784
CACNB1	-0.228033	6.89515	-5.50885	9.77875e-08	1.35211e-05	7.49868
PPP1R12B	0.315573	7.7861	5.47989	1.13019e-07	1.55001e-05	7.36252
MYD88	-0.267778	8.20803	-5.4712	1.18021e-07	1.60556e-05	7.32179
ZNF585A	0.217564	5.64436	5.46589	1.21187e-07	1.63544e-05	7.2969
REM2	-0.177817	4.81631	-5.46338	1.22708e-07	1.64283e-05	7.28517
S1PR1	-0.333006	8.20464	-5.46115	1.24081e-07	1.64813e-05	7.27471
FGFR2	0.442247	8.52686	5.45784	1.26144e-07	1.66245e-05	7.2592
STXBP2	-0.260812	7.80625	-5.45474	1.281e-07	1.67513e-05	7.24474
SNX11	-0.188733	6.85652	-5.43709	1.39842e-07	1.80767e-05	7.16228
RGL4	-0.278288	5.71908	-5.43631	1.40378e-07	1.80767e-05	7.15868
C6orf223	-0.274223	5.00734	-5.43438	1.41729e-07	1.81123e-05	7.14968
TP53BP1	0.201629	8.268	5.42155	1.51038e-07	1.91569e-05	7.08988
POU2F2	-0.227322	5.82663	-5.41958	1.52517e-07	1.91845e-05	7.08072
ADRA1B	-0.307052	6.27803	-5.41824	1.53531e-07	1.91845e-05	7.07449
SLC9A3R2	-0.388233	8.63818	-5.40953	1.60292e-07	1.97779e-05	7.03399
SYTL2	0.283152	6.82903	5.40911	1.60624e-07	1.97779e-05	7.03204
APOBEC2	-0.278813	4.75697	-5.40661	1.62619e-07	1.98784e-05	7.02044
SFMBT1	0.205258	7.67601	5.40374	1.64938e-07	2.00169e-05	7.00713
ADRBK1	-0.210856	7.13155	-5.38964	1.76828e-07	2.13065e-05	6.94172
RNF182	-0.404338	6.00899	-5.38557	1.80409e-07	2.14837e-05	6.92288
POLR1D	-0.201705	7.97563	-5.38508	1.80846e-07	2.14837e-05	6.92061
ZNF419	0.194357	6.00413	5.37244	1.92457e-07	2.27032e-05	6.86214
TTC3	0.267001	9.10049	5.36949	1.95267e-07	2.28748e-05	6.84852
ADORA3	-0.407657	6.26184	-5.36454	2.00079e-07	2.32768e-05	6.82565
ARHGEF11	-0.181596	7.16867	-5.36302	2.0158e-07	2.32907e-05	6.81863
PKNOX2	-0.321252	6.988	-5.35497	2.09708e-07	2.40651e-05	6.78149
EIF3L	0.167802	10.8653	5.35313	2.11614e-07	2.41197e-05	6.773
RBM25	0.224719	9.57778	5.33955	2.26184e-07	2.55131e-05	6.71045
IDH3B	-0.146986	8.49726	-5.33893	2.26863e-07	2.55131e-05	6.70764
SIGLEC10	-0.491741	6.37867	-5.32023	2.48599e-07	2.77723e-05	6.62171
UPB1	-0.19943	5.09508	-5.31508	2.54927e-07	2.82709e-05	6.59811
CBR1	-0.222653	7.60215	-5.31389	2.56414e-07	2.82709e-05	6.59265
PSEN2	-0.164499	7.20609	-5.3109	2.60178e-07	2.84996e-05	6.57896
RSRC2	0.288272	8.8868	5.3076	2.64402e-07	2.87754e-05	6.56384
TNFRSF11A	-0.267083	5.78735	-5.30584	2.66678e-07	2.88372e-05	6.55579
WNT1	-0.211668	5.65729	-5.30176	2.72041e-07	2.92297e-05	6.5371
GRB2	-0.181055	9.1018	-5.29874	2.76075e-07	2.93263e-05	6.52328
CASKIN2	-0.292591	7.27653	-5.29848	2.76417e-07	2.93263e-05	6.52212
TEX261	-0.178145	8.61035	-5.27799	3.05382e-07	3.21456e-05	6.42857
SSX4B	-0.113009	3.79029	-5.27704	3.06802e-07	3.21456e-05	6.42421
PPP1CA	-0.193408	9.41259	-5.26075	3.32033e-07	3.45745e-05	6.35004
STK40	-0.211511	8.29914	-5.2473	3.54367e-07	3.66737e-05	6.28895
RNF13	-0.188196	9.11813	-5.24495	3.58414e-07	3.68664e-05	6.27829
ANKRD36	0.386062	9.86188	5.22712	3.9065e-07	3.97177e-05	6.19749
GPBP1	0.237639	9.56098	5.22663	3.91578e-07	3.97177e-05	6.19526
CCDC38	-0.222614	3.5543	-5.22533	3.94026e-07	3.97177e-05	6.18941
LYSMD2	-0.185155	6.51134	-5.22453	3.95553e-07	3.97177e-05	6.18579
CDC42EP2	-0.290601	7.44897	-5.21654	4.11085e-07	4.10331e-05	6.14966
RMND5B	-0.154172	7.56923	-5.21254	4.19069e-07	4.15708e-05	6.13161
FRS2	0.223084	7.63433	5.21139	4.21401e-07	4.15708e-05	6.12641
C5orf30	-0.233248	6.15719	-5.20968	4.24884e-07	4.16707e-05	6.11869
DCBLD1	0.291943	7.45069	5.20327	4.38178e-07	4.27261e-05	6.08979
PKN1	-0.208554	8.11844	-5.19343	4.59399e-07	4.4538e-05	6.04543
MAF	-0.232288	7.40554	-5.18807	4.71359e-07	4.54363e-05	6.02133
WHSC1L1	0.203605	8.64454	5.18451	4.79484e-07	4.59569e-05	6.0053
ZRANB1	0.175662	8.87169	5.18268	4.83704e-07	4.60994e-05	5.99709
GOLM1	0.355799	7.72741	5.17244	5.08034e-07	4.81462e-05	5.95107
LONP2	0.15404	9.00504	5.16962	5.14918e-07	4.8526e-05	5.93845
VPS13A	0.260302	8.29412	5.16689	5.21691e-07	4.88911e-05	5.9262
CYTH4	-0.358834	7.55369	-5.16511	5.26171e-07	4.90386e-05	5.91818
SLC50A1	-0.252842	8.07418	-5.15855	5.42916e-07	4.98236e-05	5.88881
PCBP1	-0.144737	9.94473	-5.1585	5.43043e-07	4.98236e-05	5.88859
GATA2	-0.315117	7.04854	-5.15797	5.44416e-07	4.98236e-05	5.88623
MYBL1	0.340097	6.00394	5.15721	5.46409e-07	4.98236e-05	5.8828
MRPL9	-0.130328	8.67637	-5.14558	5.77602e-07	5.23848e-05	5.83076
HERC2	0.278477	9.80136	5.14273	5.85495e-07	5.28167e-05	5.81803
RIN2	-0.239094	8.87336	-5.13749	6.00304e-07	5.37751e-05	5.79462
ZNF486	0.384039	6.95655	5.13672	6.02496e-07	5.37751e-05	5.79121
GRIA3	0.238734	4.19779	5.13359	6.11541e-07	5.42952e-05	5.77724
MIS18A	-0.176913	6.47197	-5.13104	6.1901e-07	5.44701e-05	5.76586
C1orf174	-0.176977	8.1031	-5.12997	6.22163e-07	5.44701e-05	5.7611
PGP	-0.192524	6.67774	-5.12962	6.23198e-07	5.44701e-05	5.75955
NUPR1	-0.239259	9.93429	-5.11572	6.65779e-07	5.78141e-05	5.69761
SYNPO2	0.495358	8.50623	5.11475	6.68853e-07	5.78141e-05	5.69329
ITSN1	0.211208	7.35049	5.11384	6.71739e-07	5.78141e-05	5.68926
BOLL	-0.105785	3.60275	-5.10872	6.88259e-07	5.89352e-05	5.66649
WBP2	-0.215137	8.24489	-5.10656	6.9535e-07	5.92417e-05	5.65689
FAM172A	0.219433	8.56929	5.0887	7.56737e-07	6.41477e-05	5.57763
FZD7	0.33543	7.48596	5.08554	7.68119e-07	6.46413e-05	5.56365
LOC646513	0.241913	5.16939	5.08496	7.70224e-07	6.46413e-05	5.56109
EDNRB	-0.401035	9.25912	-5.08128	7.83757e-07	6.53013e-05	5.54477
BCL7B	-0.21011	8.65884	-5.08072	7.8583e-07	6.53013e-05	5.5423
FAM171B	0.31343	6.47924	5.07742	7.98183e-07	6.60027e-05	5.52769
FOXF1	-0.328787	7.29146	-5.069	8.30539e-07	6.83432e-05	5.49047
CCDC84	-0.244385	8.4401	-5.06555	8.44131e-07	6.89538e-05	5.47527
HYAL1	-0.304421	7.67841	-5.06505	8.46134e-07	6.89538e-05	5.47305
BTNL9	-0.631022	7.69175	-5.06354	8.52174e-07	6.91121e-05	5.46639
UBXN7	0.229392	8.47035	5.06065	8.63852e-07	6.9519e-05	5.45364
NOP10	-0.242423	9.06975	-5.06027	8.65433e-07	6.9519e-05	5.45193
AOC3	-0.334491	9.87729	-5.04966	9.09725e-07	7.27305e-05	5.40519
MAP4K5	0.193411	8.9079	5.03928	9.55208e-07	7.60066e-05	5.35952
VIM	0.161638	11.979	5.03286	9.84468e-07	7.79671e-05	5.33127
ND2	-0.490261	9.7394	-5.02876	1.00355e-06	7.91067e-05	5.3133
ARHGAP6	-0.293659	6.66472	-5.02585	1.01736e-06	7.95755e-05	5.3005
CTNS	-0.186514	7.22761	-5.02424	1.02505e-06	7.95755e-05	5.29346
ELP2	0.149832	8.57636	5.02301	1.03098e-06	7.95755e-05	5.28805
KCNN3	0.248617	6.25214	5.02272	1.03238e-06	7.95755e-05	5.28679
ARRB2	-0.250801	8.93263	-5.02258	1.03308e-06	7.95755e-05	5.28615
PCSK9	-0.332103	6.61514	-5.02036	1.04386e-06	8.00402e-05	5.27644
SUN2	-0.25301	8.57919	-5.01619	1.06442e-06	8.12475e-05	5.25818
DLG2	0.310807	5.66287	5.00586	1.11714e-06	8.48878e-05	5.21294
ARL8A	-0.166222	8.84397	-4.99862	1.15556e-06	8.70054e-05	5.1813
UBE2Q1	-0.119024	8.5933	-4.99851	1.15616e-06	8.70054e-05	5.18081
ZCCHC7	0.164966	6.91633	4.99751	1.16154e-06	8.70054e-05	5.17647
PHYHIP	0.263967	5.39311	4.99676	1.16564e-06	8.70054e-05	5.17317
TRIM3	-0.137704	5.50482	-4.99465	1.17719e-06	8.74799e-05	5.16395
SEMA3F	-0.249889	6.77979	-4.98952	1.20566e-06	8.92031e-05	5.14158
MEGF9	-0.308817	9.289	-4.98702	1.21979e-06	8.98544e-05	5.13068
BCL2	0.235097	7.33726	4.97883	1.26726e-06	9.2945e-05	5.09497
REXO1	-0.183013	6.13431	-4.97465	1.29213e-06	9.38446e-05	5.07678
MTMR14	-0.167247	8.39435	-4.97383	1.29705e-06	9.38446e-05	5.07323
ZNF37A	0.228972	7.09414	4.97312	1.30135e-06	9.38446e-05	5.07013
FAAH2	0.224982	6.40013	4.97305	1.30177e-06	9.38446e-05	5.06983
RNF41	-0.138945	7.24667	-4.96844	1.33e-06	9.52238e-05	5.04976
GPR21	0.192793	6.32954	4.96684	1.33993e-06	9.52238e-05	5.04281
SULF1	0.482787	8.67343	4.96682	1.34003e-06	9.52238e-05	5.04273
SH2D3C	-0.303049	7.76094	-4.96627	1.34349e-06	9.52238e-05	5.04032
IZUMO1	-0.472223	4.77506	-4.96432	1.35569e-06	9.56867e-05	5.03186
DSCR3	-0.146211	8.45759	-4.96338	1.36161e-06	9.5704e-05	5.02779
KCNG3	-0.311122	4.94004	-4.96219	1.36919e-06	9.5838e-05	5.02259
CCR1	-0.449866	6.65603	-4.96032	1.38111e-06	9.59358e-05	5.01449
C11orf30	0.200051	7.55756	4.96019	1.38197e-06	9.59358e-05	5.01391
ANKRD17	0.175784	9.12878	4.95916	1.38859e-06	9.60007e-05	5.00943
CDH2	0.43267	6.03371	4.95726	1.40089e-06	9.63052e-05	5.00119
MTF2	0.214718	8.62221	4.95662	1.40501e-06	9.63052e-05	4.99844
KRT4	-0.448845	6.36389	-4.95584	1.41012e-06	9.63052e-05	4.99504
PLCD3	-0.204984	6.03776	-4.95463	1.41804e-06	9.64554e-05	4.98981
CLCN6	-0.150013	8.2642	-4.95252	1.432e-06	9.70136e-05	4.98065
MGAM	-0.70825	6.16323	-4.95122	1.44068e-06	9.72111e-05	4.975
GAN	0.215279	7.30883	4.94821	1.46088e-06	9.81819e-05	4.96197
SHE	-0.271743	7.86174	-4.94615	1.47491e-06	9.87313e-05	4.95303
LILRB3	-0.33252	7.6351	-4.94048	1.51413e-06	0.000100956	4.92849
TMEM180	-0.242632	7.20906	-4.93692	1.53931e-06	0.000102231	4.91307
ULK3	-0.127133	7.37035	-4.92741	1.60852e-06	0.000105936	4.87195
TCF12	0.154778	9.3298	4.92661	1.61445e-06	0.000105936	4.86851
C4BPB	-0.283186	4.96147	-4.92598	1.61914e-06	0.000105936	4.8658
SCAMP3	-0.177494	7.95446	-4.92584	1.62022e-06	0.000105936	4.86517
MALL	0.328775	9.69175	4.9236	1.63709e-06	0.000106625	4.85549
ITGA9	0.254174	8.51603	4.92124	1.65497e-06	0.000107375	4.84534
DNAJC14	-0.152969	7.32486	-4.91446	1.70759e-06	0.000110366	4.81607
PGM2L1	0.294526	6.85762	4.91045	1.73941e-06	0.000111601	4.79882
THAP1	-0.239715	6.99463	-4.90976	1.74495e-06	0.000111601	4.79584
IMPDH1	-0.164967	7.33646	-4.90956	1.74655e-06	0.000111601	4.79499
ATP6V1B2	-0.202596	10.7129	-4.9055	1.77952e-06	0.000112854	4.77751
NECAP1	-0.160093	8.23708	-4.9055	1.77954e-06	0.000112854	4.7775
ANKRD40	-0.17565	8.14239	-4.90452	1.78761e-06	0.000112941	4.77327
NBEA	0.358364	7.21959	4.89667	1.85335e-06	0.000116658	4.73951
FUCA2	-0.165513	8.58787	-4.89353	1.88027e-06	0.000117912	4.72604
SAFB	0.231266	8.77076	4.89146	1.89823e-06	0.000118468	4.71716
PDE3B	0.309337	7.92657	4.8909	1.90318e-06	0.000118468	4.71472
TMEM38A	-0.200918	6.08689	-4.88921	1.918e-06	0.000118951	4.70747
MVD	-0.211713	7.26774	-4.88378	1.96637e-06	0.000121504	4.6842
DDX25	0.206468	4.15632	4.87702	2.02832e-06	0.000124847	4.65522
ZCCHC11	0.221509	8.56058	4.87627	2.03527e-06	0.000124847	4.65202
ZDHHC5	-0.126809	8.93993	-4.87286	2.0674e-06	0.000126358	4.63739
NSDHL	-0.226462	7.19584	-4.87155	2.07984e-06	0.00012666	4.63178
ABI3	-0.216034	7.16699	-4.86794	2.11446e-06	0.000128305	4.61636
PPP1R11	-0.220876	7.67282	-4.86672	2.12635e-06	0.000128564	4.61112
SNX3	-0.183329	9.2587	-4.86118	2.18088e-06	0.000131012	4.58747
QPCT	-0.304122	6.62035	-4.86103	2.18237e-06	0.000131012	4.58683
PPP4C	-0.186569	8.13423	-4.85622	2.23096e-06	0.000133454	4.56626
ADAMTSL1	0.361918	5.61129	4.85374	2.25632e-06	0.000134494	4.5557
CDK18	-0.192893	6.0598	-4.84823	2.31391e-06	0.000137441	4.53216
HNRNPA3	0.217606	10.5129	4.84352	2.36416e-06	0.000139933	4.5121
SLX4	-0.139003	6.28937	-4.83966	2.40609e-06	0.000141588	4.49568
AFF2	-0.374062	5.87773	-4.8394	2.4089e-06	0.000141588	4.49459
PTPN4	0.207974	7.29429	4.83788	2.42571e-06	0.000142081	4.48809
LUC7L3	0.280842	9.4062	4.83298	2.48042e-06	0.000144783	4.46727
BRWD1	0.242771	8.38002	4.82959	2.51905e-06	0.000146393	4.45284
FAM86A	-0.193891	6.43036	-4.82904	2.52537e-06	0.000146393	4.4505
ZMAT5	-0.170097	6.50842	-4.82625	2.55761e-06	0.000147754	4.43865
OR10H3	-0.25648	4.11673	-4.81992	2.6323e-06	0.000151101	4.41178
PIK3CD	-0.21689	6.63654	-4.81982	2.63345e-06	0.000151101	4.41137
GOLGA6L10	0.3227	8.50484	4.81822	2.65274e-06	0.000151692	4.40456
ERGIC1	-0.135039	9.01702	-4.81523	2.68899e-06	0.000153245	4.39189
SIPA1L1	0.173897	8.72117	4.81002	2.75336e-06	0.000156221	4.3698
AMDHD1	-0.199785	5.50905	-4.80951	2.75972e-06	0.000156221	4.36765
IL15RA	-0.214401	8.00243	-4.80508	2.81574e-06	0.000158858	4.34889
CHKA	0.184603	8.562	4.79779	2.91038e-06	0.000163545	4.31803
MYT1L	-0.108293	4.34749	-4.79719	2.9182e-06	0.000163545	4.31553
CCL21	0.498746	8.54437	4.79358	2.9663e-06	0.00016569	4.30027
NADK	-0.157281	7.76893	-4.79079	3.00402e-06	0.000166953	4.28848
SHPRH	0.244796	7.59567	4.79045	3.0087e-06	0.000166953	4.28703
MEG3	0.29861	6.66123	4.7893	3.02436e-06	0.000167272	4.28218
SEC14L4	-0.441143	6.46392	-4.78853	3.03494e-06	0.000167308	4.27892
CDKAL1	0.163016	8.21167	4.78346	3.10527e-06	0.000170628	4.25754
MAP3K4	0.182937	8.27575	4.7813	3.13567e-06	0.000171471	4.24845
RNF183	-0.243728	5.17269	-4.78093	3.14094e-06	0.000171471	4.24689
ITPK1	-0.161644	7.38107	-4.77652	3.20419e-06	0.00017436	4.22828
TMEM106A	-0.226533	6.85621	-4.76966	3.30482e-06	0.000179257	4.19943
ZNF544	0.146248	6.39632	4.76871	3.31912e-06	0.000179456	4.1954
MPPE1	-0.177012	6.81694	-4.76579	3.36299e-06	0.000181247	4.18315
MKNK1	-0.183019	8.93402	-4.76388	3.39211e-06	0.000182234	4.17511
SPATA2	-0.179379	5.8677	-4.76186	3.42318e-06	0.000183319	4.1666
CAMK1	-0.17892	6.73825	-4.76015	3.44952e-06	0.000184145	4.15945
HCK	-0.3876	8.4044	-4.75846	3.47596e-06	0.000184971	4.15233
DUSP7	-0.321886	7.91217	-4.75202	3.57819e-06	0.000188116	4.12529
GLT1D1	-0.432462	6.19353	-4.7517	3.58324e-06	0.000188116	4.12398
ZCCHC24	-0.204605	7.6344	-4.75168	3.58356e-06	0.000188116	4.12389
MACF1	0.331811	10.7179	4.75165	3.58403e-06	0.000188116	4.12377
TXNRD1	-0.405405	8.9745	-4.75123	3.59082e-06	0.000188116	4.12201
TLR1	-0.33712	7.4737	-4.74821	3.63987e-06	0.000190096	4.10935
IL17RA	-0.227853	8.27748	-4.74341	3.71936e-06	0.000193534	4.0892
BTRC	0.141855	7.32015	4.74285	3.72865e-06	0.000193534	4.08688
SMAD5	0.21727	8.44594	4.74198	3.74333e-06	0.0001937	4.08321
UBE2D1	-0.216624	8.21215	-4.74005	3.77584e-06	0.000194359	4.07515
NF1	0.142532	8.57936	4.73986	3.77911e-06	0.000194359	4.07434
FGR	-0.314185	8.54363	-4.73712	3.82588e-06	0.000196167	4.06287
MBP	-0.121305	6.183	-4.73322	3.89337e-06	0.000199022	4.04656
MBD2	-0.186201	8.93513	-4.73163	3.92121e-06	0.00019984	4.03992
RYR3	0.310645	4.862	4.72696	4.00414e-06	0.000203451	4.0204
CASC3	-0.120575	9.18336	-4.72488	4.04161e-06	0.000204738	4.01172
MRPL16	-0.130527	7.64704	-4.72045	4.12246e-06	0.000207285	3.99325
CHERP	-0.123771	7.46805	-4.72043	4.1228e-06	0.000207285	3.99318
GCA	-0.309306	9.02641	-4.72011	4.12875e-06	0.000207285	3.99183
MMACHC	-0.169089	5.40636	-4.71637	4.19838e-06	0.000210156	3.97624
LCMT2	-0.169408	7.06039	-4.71492	4.22569e-06	0.000210792	3.97019
TMEM97	-0.310778	7.9403	-4.71437	4.23608e-06	0.000210792	3.9679
TNXB	0.316933	8.7499	4.71194	4.2825e-06	0.000212475	3.95775
NFAM1	-0.220606	5.75414	-4.70738	4.37048e-06	0.000216204	3.93879
SLC13A1	-0.104932	3.21174	-4.70643	4.38903e-06	0.000216487	3.93484
EPB41L4A	0.215304	7.23268	4.70444	4.42824e-06	0.000217784	3.92655
PHF7	-0.161337	5.4059	-4.70284	4.46005e-06	0.000218711	3.91988
LYPD5	-0.243959	6.24211	-4.70071	4.50259e-06	0.000219837	3.91103
THY1	0.590771	8.5247	4.70039	4.50909e-06	0.000219837	3.90969
RASGRP2	-0.174883	7.45408	-4.69785	4.5605e-06	0.000221426	3.89912
S100A8	-0.646869	10.0781	-4.69742	4.56924e-06	0.000221426	3.89734
CLN3	-0.176297	7.81222	-4.69663	4.58534e-06	0.000221426	3.89406
KCNK13	-0.229026	5.28108	-4.6962	4.59417e-06	0.000221426	3.89226
C6orf89	-0.128624	8.69035	-4.69393	4.64088e-06	0.00022304	3.88284
NLRP12	-0.271286	5.26911	-4.69128	4.69594e-06	0.000224448	3.87184
TRIM21	-0.219716	6.89957	-4.69124	4.69679e-06	0.000224448	3.87168
MIER2	-0.171602	6.2481	-4.68313	4.86932e-06	0.000232035	3.83806
LHX3	-0.184978	5.3213	-4.68168	4.901e-06	0.000232802	3.83202
PPIL2	-0.133079	7.60013	-4.68113	4.91301e-06	0.000232802	3.82973
CD53	-0.251503	10.8834	-4.67694	5.00517e-06	0.000236505	3.81242
CD14	-0.403146	9.4342	-4.67332	5.08643e-06	0.000239673	3.79741
FOXP2	0.277375	5.25281	4.67163	5.12464e-06	0.000240801	3.79044
ZNF506	0.152639	8.15505	4.66804	5.20701e-06	0.000243992	3.77559
NANOS1	-0.178031	5.84585	-4.66638	5.24559e-06	0.000245119	3.76871
ZNF221	0.227316	5.09856	4.66381	5.30579e-06	0.00024667	3.75808
MLX	-0.150565	8.01743	-4.66267	5.33254e-06	0.00024667	3.7534
PHB	-0.185764	9.01892	-4.66241	5.33878e-06	0.00024667	3.75231
PDCD4	0.270534	9.58157	4.6622	5.3438e-06	0.00024667	3.75143
C1orf145	-0.254867	4.95607	-4.6614	5.36265e-06	0.00024667	3.74815
CYFIP1	-0.167047	9.41591	-4.66115	5.36863e-06	0.00024667	3.74711
MBTD1	0.316918	7.41071	4.66003	5.39547e-06	0.00024667	3.74247
SLC39A8	-0.441965	11.4315	-4.66001	5.39577e-06	0.00024667	3.74241
G6PD	-0.236607	8.02955	-4.65936	5.41142e-06	0.000246717	3.73972
NLGN4X	-0.361187	5.4193	-4.65479	5.5221e-06	0.000250474	3.72086
CA4	-0.563682	6.58299	-4.65473	5.52353e-06	0.000250474	3.72062
SLC38A7	-0.172006	5.99759	-4.65203	5.58984e-06	0.000252464	3.7095
TMEM62	-0.317891	7.80344	-4.65173	5.59734e-06	0.000252464	3.70825
GFRA1	0.345081	6.44178	4.64789	5.69325e-06	0.000256105	3.69243
FUT8	0.235866	8.51802	4.64018	5.89074e-06	0.000264284	3.66067
PIEZO1	-0.166961	6.7918	-4.63762	5.95778e-06	0.000266583	3.65014
RORA	0.262606	8.10551	4.63637	5.99064e-06	0.000267344	3.64501
TIMM23	-0.181962	5.61121	-4.62971	6.16934e-06	0.000274593	3.61764
S100A11	-0.207919	10.7408	-4.62755	6.22844e-06	0.000276493	3.60877
GEM	0.473126	8.65015	4.62514	6.29498e-06	0.000277847	3.59887
C7orf49	-0.166575	7.64261	-4.62469	6.30727e-06	0.000277847	3.59706
CCDC80	0.605332	9.44802	4.62418	6.32144e-06	0.000277847	3.59497
DCTN3	-0.205575	8.63407	-4.62406	6.32482e-06	0.000277847	3.59447
CAND1	0.189276	8.71098	4.6202	6.43325e-06	0.000281877	3.57865
LILRA3	-0.373621	6.13429	-4.61387	6.61511e-06	0.000289094	3.5527
ACVRL1	-0.318952	8.29675	-4.61039	6.71708e-06	0.000292766	3.53846
COMMD9	-0.194717	7.0392	-4.60947	6.74437e-06	0.000292766	3.53468
N4BP2	0.315523	7.31261	4.60924	6.7512e-06	0.000292766	3.53374
DCAF15	-0.168336	6.82755	-4.6067	6.82699e-06	0.000295293	3.52335
RNF150	0.234754	6.34747	4.60401	6.90818e-06	0.000298041	3.51235
ERC2	0.202522	4.88009	4.60245	6.95552e-06	0.000299318	3.50599
PLXDC2	0.186411	10.3655	4.59675	7.13184e-06	0.000306125	3.4827
NT5E	0.305188	6.93617	4.58869	7.38839e-06	0.000316332	3.44981
PLEKHA5	0.285339	7.6612	4.58691	7.44617e-06	0.000317324	3.44256
PI15	0.689115	6.09269	4.58682	7.44918e-06	0.000317324	3.44218
AURKC	-0.166133	5.45406	-4.58558	7.48965e-06	0.000317516	3.43714
ZNF148	0.228609	8.91106	4.5852	7.50202e-06	0.000317516	3.43561
GPR125	0.264478	7.99921	4.58495	7.51017e-06	0.000317516	3.4346
PKD2	0.227151	9.00482	4.57947	7.69263e-06	0.000324418	3.41226
SLC25A1	-0.194538	7.68829	-4.57668	7.78706e-06	0.000327581	3.40091
CHFR	-0.121946	7.84859	-4.57608	7.80731e-06	0.000327616	3.3985
NFAT5	0.200985	9.36265	4.57428	7.86912e-06	0.00032939	3.39116
FAM107A	-0.490027	8.67692	-4.57235	7.9358e-06	0.000331359	3.38331
POLR2C	-0.179331	8.23679	-4.57143	7.96784e-06	0.000331875	3.37956
MXRA5	0.446528	8.08269	4.57056	7.9979e-06	0.000332307	3.37606
CDKN2D	-0.18243	7.20027	-4.56994	8.01985e-06	0.0003324	3.37351
BBX	0.188316	8.99737	4.5546	8.57478e-06	0.000354081	3.31128
VHLL	-0.201142	4.14472	-4.55433	8.58493e-06	0.000354081	3.31018
SYNRG	0.18507	8.27917	4.5509	8.71396e-06	0.000358526	3.29631
SECISBP2L	0.30621	9.19249	4.54881	8.79367e-06	0.000360819	3.28784
MAP3K13	0.292215	7.102	4.54832	8.81246e-06	0.000360819	3.28586
GPX3	-0.356826	10.7909	-4.54215	9.05221e-06	0.000369738	3.2609
ACSS2	-0.241071	8.69903	-4.54138	9.08234e-06	0.000370072	3.25781
RPS6KA6	0.275816	5.41112	4.53851	9.19631e-06	0.000373323	3.24622
RPL3	0.150861	12.2677	4.53826	9.20637e-06	0.000373323	3.2452
HHEX	-0.279527	7.21691	-4.53368	9.39157e-06	0.000379919	3.22668
DGKH	0.287219	7.9105	4.5322	9.45192e-06	0.000381446	3.22073
CDH13	-0.398154	7.87713	-4.53102	9.50046e-06	0.00038249	3.21597
HIVEP2	0.3713	8.88688	4.52941	9.56716e-06	0.000383857	3.20946
ITGAM	-0.317494	8.29213	-4.5291	9.57992e-06	0.000383857	3.20822
SPI1	-0.298412	7.27194	-4.52676	9.67757e-06	0.00038685	3.1988
MPDZ	0.237654	8.78765	4.52482	9.75938e-06	0.000389199	3.19097
HSPA12B	-0.244196	7.15436	-4.52279	9.84564e-06	0.000391712	3.18279
AHI1	0.238712	7.96003	4.51771	1.00647e-05	0.000399486	3.16234
OGFRL1	0.244124	8.74565	4.5163	1.01265e-05	0.000400069	3.15665
ADAM11	-0.142215	5.14353	-4.51629	1.01268e-05	0.000400069	3.15662
ASNA1	-0.161026	8.46496	-4.51403	1.02262e-05	0.000403051	3.14754
RALYL	0.200392	3.84187	4.51327	1.02601e-05	0.000403445	3.14447
SLCO4A1	-0.579239	7.68909	-4.51218	1.03085e-05	0.000403721	3.1401
RIT2	-0.201665	3.58454	-4.51175	1.03274e-05	0.000403721	3.13839
FADS1	-0.26155	8.4159	-4.5115	1.03389e-05	0.000403721	3.13735
RBM5	0.187213	9.72471	4.51087	1.03671e-05	0.000403887	3.13482
BCL11A	0.232116	5.8522	4.5057	1.06013e-05	0.000412057	3.11407
ALAS2	0.561614	6.19166	4.50462	1.06508e-05	0.000413029	3.10974
BNC2	0.258084	7.56307	4.50376	1.06904e-05	0.000413148	3.10629
VPS52	-0.156878	8.48733	-4.5033	1.07118e-05	0.000413148	3.10443
N4BP1	-0.162693	7.99516	-4.50297	1.07273e-05	0.000413148	3.10309
MNDA	-0.404511	7.69596	-4.50181	1.07812e-05	0.000414279	3.09843
SMPD1	-0.181829	7.58988	-4.50042	1.08461e-05	0.000415823	3.09286
ZMYM2	0.218228	9.42654	4.49628	1.10415e-05	0.000422356	3.07626
PTMA	0.187312	6.49436	4.49525	1.10907e-05	0.000423278	3.07213
PDLIM2	-0.18828	6.83292	-4.49274	1.12112e-05	0.000426911	3.06209
SLC7A7	-0.272456	8.50088	-4.49094	1.12988e-05	0.000429278	3.05486
BTBD1	0.214303	9.20128	4.48957	1.13656e-05	0.000430844	3.04939
EMP3	-0.271791	8.92271	-4.48393	1.16449e-05	0.000440443	3.02684
B3GALNT2	0.207733	7.63055	4.48294	1.16949e-05	0.000441345	3.02286
HTR3B	-0.10612	4.17371	-4.48089	1.17984e-05	0.000444257	3.01467
ACN9	-0.176093	5.84249	-4.47838	1.19267e-05	0.000448086	3.00463
S100A12	-0.768337	7.07186	-4.47643	1.20268e-05	0.000450846	2.99686
POP4	-0.141476	7.75077	-4.4701	1.23585e-05	0.000462252	2.97159
PLEKHO2	-0.203379	8.70459	-4.46703	1.25224e-05	0.000467347	2.95936
SLC25A44	-0.263242	7.85366	-4.46512	1.26255e-05	0.000469957	2.95175
ZNF234	0.29734	7.27474	4.46471	1.26481e-05	0.000469957	2.95008
NCR3	-0.248324	5.68283	-4.46247	1.277e-05	0.000472434	2.94118
VN1R4	-0.239815	3.22359	-4.46246	1.27707e-05	0.000472434	2.94112
TCEAL1	-0.203617	8.01705	-4.45871	1.29776e-05	0.000478581	2.9262
HTR3C	-0.423605	5.26003	-4.45842	1.29937e-05	0.000478581	2.92505
NMUR1	-0.280451	6.29423	-4.45439	1.32203e-05	0.000485867	2.909
SNX17	-0.166217	9.10176	-4.44969	1.34889e-05	0.000494662	2.89033
PLCB1	0.293066	7.37334	4.44697	1.36467e-05	0.000498618	2.87953
RABIF	-0.157906	6.88095	-4.44681	1.36559e-05	0.000498618	2.8789
AIF1	-0.240849	8.73275	-4.44193	1.39442e-05	0.000508045	2.85951
METTL23	-0.158725	7.42461	-4.43992	1.40643e-05	0.000511316	2.85155
PDE6D	-0.212807	7.47388	-4.43785	1.41892e-05	0.000514747	2.84334
VAT1	-0.192654	9.10338	-4.43586	1.43106e-05	0.000518038	2.83543
MYO1F	-0.270644	7.89437	-4.43446	1.4396e-05	0.000519478	2.82991
POU6F1	-0.155582	6.54286	-4.4342	1.4412e-05	0.000519478	2.82888
PDE10A	0.302942	5.59078	4.43367	1.44449e-05	0.000519555	2.82677
KIT	0.420705	8.93597	4.43309	1.44808e-05	0.000519739	2.82446
DUSP22	-0.126067	7.75968	-4.42881	1.47475e-05	0.000528185	2.80753
HSD3B1	-0.168461	4.15884	-4.42781	1.48103e-05	0.00052931	2.80358
CERS2	-0.177349	10.446	-4.42639	1.49005e-05	0.000531411	2.79794
ZNF333	-0.166509	5.85943	-4.42463	1.50127e-05	0.00053428	2.79099
C7orf31	-0.169427	5.87181	-4.42212	1.51742e-05	0.000538893	2.78105
SCN1B	-0.20844	5.51424	-4.4133	1.57548e-05	0.000558335	2.74622
ANKRD10	0.200535	9.13556	4.41268	1.57963e-05	0.000558634	2.74378
MLF2	-0.162184	9.24962	-4.41209	1.58362e-05	0.000558871	2.74144
WNK1	0.17183	9.83984	4.40954	1.60084e-05	0.000563769	2.7314
NIPBL	0.209284	9.27759	4.40833	1.60915e-05	0.000565516	2.7266
REV3L	0.208498	9.05788	4.40465	1.63445e-05	0.000573214	2.71213
TARDBP	0.132413	9.99032	4.40379	1.64045e-05	0.000574122	2.70873
TSPAN14	-0.14715	8.89516	-4.40199	1.65303e-05	0.00057733	2.70164
LAMC3	-0.29797	7.0871	-4.40045	1.66391e-05	0.000579926	2.69556
ATG16L2	-0.183029	7.65227	-4.39992	1.66762e-05	0.000580021	2.69349
SOBP	0.16283	6.48708	4.39731	1.68623e-05	0.000585289	2.6832
DNAJA3	-0.144316	7.6508	-4.39575	1.69736e-05	0.000587943	2.67709
SDCBP2	-0.177578	6.7193	-4.39328	1.71528e-05	0.000592932	2.66735
ARMCX4	0.191734	5.32524	4.39086	1.73291e-05	0.000597801	2.65787
CEP95	0.200801	8.66815	4.38659	1.76461e-05	0.000607495	2.64106
ASPN	0.64519	8.3078	4.38379	1.78559e-05	0.000613464	2.6301
SMARCA2	0.192579	9.01807	4.38319	1.79018e-05	0.00061379	2.62772
NOX1	-0.153682	4.25052	-4.3821	1.79845e-05	0.000615375	2.62345
LRRN4	-0.420772	7.44923	-4.37943	1.81884e-05	0.000621092	2.61299
LAT2	-0.165937	6.89874	-4.37828	1.8277e-05	0.000622857	2.60849
CYB5B	-0.199598	9.83002	-4.37721	1.83604e-05	0.000624439	2.60427
WDR70	0.11943	7.92079	4.37601	1.84538e-05	0.000626139	2.59956
LRRC31	0.377098	4.54856	4.37561	1.84846e-05	0.000626139	2.59801
NKX2-2	-0.110832	4.40812	-4.37385	1.86226e-05	0.000629547	2.59112
PKP1	0.260819	5.4792	4.37302	1.86881e-05	0.0006305	2.58786
EFNB1	-0.216911	7.7239	-4.3702	1.89122e-05	0.000635939	2.57681
C11orf58	0.159116	10.5727	4.36959	1.89604e-05	0.000635939	2.57445
WEE1	0.275422	7.36837	4.36957	1.89624e-05	0.000635939	2.57435
H1F0	-0.264645	9.02702	-4.36682	1.91835e-05	0.000642075	2.56361
ABCB1	0.462261	6.49278	4.36627	1.92282e-05	0.000642299	2.56145
ZNF483	0.281123	6.16986	4.36376	1.94329e-05	0.000647851	2.55164
RGS1	0.565576	9.10981	4.36058	1.96954e-05	0.000652929	2.5392
SGSM2	0.138582	7.56501	4.35993	1.97493e-05	0.000652929	2.53667
MANSC1	-0.19161	7.68353	-4.35984	1.97568e-05	0.000652929	2.53631
C17orf104	0.147826	3.00241	4.35942	1.97917e-05	0.000652929	2.53468
DIO2	0.2861	5.20033	4.35932	1.98003e-05	0.000652929	2.53427
TRIM25	-0.170998	8.26616	-4.35911	1.98174e-05	0.000652929	2.53347
MYBPC3	-0.180846	5.98644	-4.35315	2.03214e-05	0.00066823	2.5102
PAPSS2	-0.260941	9.94598	-4.34981	2.0609e-05	0.00067525	2.49717
HSD17B12	-0.166739	8.97466	-4.34974	2.06149e-05	0.00067525	2.49691
KRT72	-0.25421	4.69065	-4.3457	2.09684e-05	0.000685495	2.48115
POLD3	0.174565	7.54946	4.34503	2.10272e-05	0.000686087	2.47856
SEC16A	-0.143863	8.43169	-4.34278	2.12273e-05	0.000691282	2.46978
ACAT2	-0.271293	7.46419	-4.33557	2.18797e-05	0.000711153	2.44174
CFP	-0.260651	7.05743	-4.33463	2.19661e-05	0.000712451	2.43808
C3AR1	-0.333814	9.27669	-4.33403	2.20213e-05	0.000712451	2.43576
CXCR2	-0.479125	6.27152	-4.33376	2.20463e-05	0.000712451	2.43471
SCAF4	0.175804	8.32014	4.33262	2.21519e-05	0.000713811	2.43028
WIBG	-0.122366	6.6773	-4.33199	2.22114e-05	0.000713811	2.42779
BOC	0.254151	6.1908	4.33166	2.22418e-05	0.000713811	2.42653
PLB1	-0.153011	5.42542	-4.33149	2.22577e-05	0.000713811	2.42587
CDON	0.310294	6.89895	4.32547	2.28261e-05	0.000730652	2.40251
USP37	0.162323	7.15119	4.32364	2.3002e-05	0.000732918	2.3954
NQO1	-0.341481	6.85198	-4.32298	2.30661e-05	0.000732918	2.39282
SLC22A13	-0.146095	4.83511	-4.32296	2.30675e-05	0.000732918	2.39276
WISP2	-0.350916	8.17525	-4.32293	2.30707e-05	0.000732918	2.39263
IGF1	0.473829	7.93561	4.31919	2.34343e-05	0.000743069	2.37815
SERPINA12	0.16681	4.2547	4.31788	2.35634e-05	0.000744555	2.37306
COL22A1	-0.182929	5.07082	-4.31782	2.35694e-05	0.000744555	2.37282
HVCN1	-0.207502	6.88127	-4.31731	2.36192e-05	0.000744734	2.37087
DEGS1	-0.174524	9.03369	-4.31491	2.38576e-05	0.000749738	2.36157
PLCG2	0.152474	11.9155	4.31482	2.38668e-05	0.000749738	2.36121
AEBP2	0.126988	8.93819	4.31395	2.3954e-05	0.000751077	2.35784
NCOR2	-0.151246	8.7903	-4.313	2.40491e-05	0.000752662	2.35416
WIF1	0.60529	10.0794	4.30872	2.44826e-05	0.000764809	2.33762
S100A3	-0.417095	5.65019	-4.30737	2.46211e-05	0.000767715	2.3324
CRLF2	0.288743	4.74184	4.30326	2.50473e-05	0.000778477	2.31651
FEZ1	-0.235486	6.53993	-4.30315	2.50586e-05	0.000778477	2.31609
SOSTDC1	-0.750905	6.64141	-4.3011	2.52744e-05	0.000783739	2.30815
NAPA	-0.175462	8.30429	-4.3	2.539e-05	0.000785879	2.30392
TRIM26	-0.124461	7.50137	-4.29805	2.55977e-05	0.000790132	2.29638
SLC5A11	-0.215354	4.98419	-4.29783	2.56211e-05	0.000790132	2.29554
AP2M1	-0.15152	9.86545	-4.29335	2.61044e-05	0.000803568	2.27823
PPARGC1B	-0.194746	6.12457	-4.29193	2.62588e-05	0.000806848	2.27278
INADL	0.237768	8.33238	4.29148	2.63086e-05	0.000806909	2.27102
FLI1	-0.184376	8.89115	-4.29066	2.63984e-05	0.000808192	2.26787
GGA1	-0.153135	7.54432	-4.28918	2.65608e-05	0.000811692	2.26219
ADAMTS2	-0.230916	7.09409	-4.28787	2.67063e-05	0.000814662	2.25713
MAN2A1	0.182428	8.68707	4.28728	2.67721e-05	0.000815195	2.25486
COL18A1	0.183467	8.06679	4.2859	2.69264e-05	0.000818416	2.24954
IKZF2	0.226321	6.41354	4.28513	2.70129e-05	0.000819568	2.24657
NR2C2	0.156643	8.33787	4.28457	2.70753e-05	0.000819987	2.24443
PHIP	0.214402	9.02743	4.27383	2.83117e-05	0.000855895	2.20311
AFMID	-0.194687	7.13134	-4.27014	2.87486e-05	0.000866729	2.18893
CNST	0.206474	7.21311	4.26993	2.87728e-05	0.000866729	2.18815
C1orf162	-0.260252	9.75096	-4.26722	2.90988e-05	0.000874988	2.17773
COPS7A	-0.14829	8.39512	-4.26652	2.91829e-05	0.000875953	2.17506
GNAI2	-0.136832	7.33596	-4.265	2.93672e-05	0.000879922	2.16923
RPL7	0.182137	11.1865	4.2615	2.97962e-05	0.000890587	2.15582
TCN2	-0.26315	7.62247	-4.26124	2.98288e-05	0.000890587	2.15481
SDHAF2	-0.115153	9.07119	-4.25893	3.01157e-05	0.000896101	2.14595
PTPN14	0.246387	7.97552	4.25889	3.01197e-05	0.000896101	2.14583
CEACAM1	-0.251652	6.21457	-4.25642	3.04294e-05	0.000903072	2.13636
ACLY	-0.151153	9.01858	-4.25571	3.05195e-05	0.000903072	2.13363
YAP1	0.129758	9.42638	4.25557	3.05366e-05	0.000903072	2.13311
MZT2A	-0.17412	6.36884	-4.25532	3.05681e-05	0.000903072	2.13215
COX10	-0.133412	6.65889	-4.25353	3.07956e-05	0.000908202	2.1253
AZIN1	0.163111	9.58766	4.25262	3.09123e-05	0.000910051	2.1218
FGD5	-0.234824	6.75656	-4.25153	3.10513e-05	0.000912551	2.11765
N6AMT1	0.1997	6.98212	4.25003	3.12445e-05	0.000916632	2.11191
NRBP2	-0.213532	7.20071	-4.24716	3.16175e-05	0.000925964	2.10093
SOX5	0.223234	6.67637	4.24512	3.18844e-05	0.000932164	2.09316
NFIA	0.232739	9.45291	4.24444	3.19742e-05	0.000933171	2.09056
SIGLEC5	-0.309807	5.98303	-4.24019	3.25402e-05	0.000948048	2.07433
ZNF682	0.287854	6.72331	4.239	3.27006e-05	0.000951079	2.06978
FCN3	-0.737314	9.83249	-4.23775	3.28699e-05	0.000954358	2.06501
RASAL2	0.194742	8.31848	4.23721	3.29434e-05	0.00095485	2.06294
SOX7	-0.253784	6.21572	-4.23564	3.31572e-05	0.000959397	2.05696
MED6	0.128297	8.17274	4.23279	3.35489e-05	0.000969069	2.0461
C1orf43	-0.146921	10.2032	-4.23066	3.3844e-05	0.000974307	2.038
GHDC	-0.140121	6.39949	-4.23065	3.38458e-05	0.000974307	2.03795
PDE1A	0.357006	6.38955	4.22835	3.41681e-05	0.000981911	2.02919
RNPC3	0.266228	8.61038	4.22742	3.42992e-05	0.000982649	2.02565
TMEM50A	-0.169299	10.4582	-4.22699	3.43601e-05	0.000982649	2.02401
CFH	0.337786	10.2466	4.22693	3.43686e-05	0.000982649	2.02378
ARHGEF7	0.166981	8.18415	4.22489	3.46577e-05	0.000988018	2.01604
DCBLD2	0.18721	9.13661	4.22458	3.47025e-05	0.000988018	2.01484
MTR	0.158567	8.21142	4.22437	3.4732e-05	0.000988018	2.01406
HCFC1	-0.239465	7.47745	-4.22321	3.48984e-05	0.000991078	2.00964
BRAF	0.181695	8.83857	4.22258	3.4989e-05	0.000991981	2.00724
SPATS2	0.197742	7.53233	4.22085	3.5239e-05	0.000997395	2.00066
RGS14	-0.150658	6.43081	-4.22008	3.53496e-05	0.000998848	1.99776
AKR1B10	0.331318	3.78125	4.21966	3.54109e-05	0.000998907	1.99616
TOX2	-0.193931	6.9361	-4.21875	3.55446e-05	0.00100101	1.99268
RELT	-0.182951	6.60879	-4.21338	3.63364e-05	0.0010216	1.97231
GLE1	-0.157205	7.25907	-4.21173	3.65834e-05	0.00102683	1.96605
CFHR2	0.20004	2.9866	4.21108	3.66822e-05	0.00102789	1.96356
VIPR1	-0.600554	8.69904	-4.21044	3.67773e-05	0.00102885	1.96116
BTC	0.238849	5.69833	4.20965	3.68981e-05	0.00102973	1.95813
MCRS1	-0.143932	7.33487	-4.20943	3.69308e-05	0.00102973	1.95731
CACNA1H	-0.177728	6.30339	-4.20895	3.70041e-05	0.00103007	1.95548
TTC21B	0.236358	7.50823	4.20731	3.72528e-05	0.00103528	1.94929
FAM86C1	-0.137456	6.16466	-4.20686	3.73223e-05	0.00103551	1.94757
RAD51	0.208839	4.75619	4.20606	3.74455e-05	0.00103722	1.94452
DPYD	-0.212242	9.48219	-4.20266	3.79709e-05	0.0010497	1.93165
STXBP5	0.147611	8.05191	4.20234	3.80204e-05	0.0010497	1.93044
MFGE8	-0.237135	8.47358	-4.20053	3.83025e-05	0.00105576	1.92361
SARS	-0.13763	10.0821	-4.19991	3.84e-05	0.00105672	1.92126
ZFPL1	-0.155611	7.16988	-4.19842	3.8635e-05	0.00106146	1.91563
CBS	-0.262233	6.65832	-4.19623	3.89839e-05	0.0010693	1.90732
HMCN1	0.348178	8.71458	4.19474	3.92228e-05	0.0010741	1.90167
UBE2J1	-0.243361	8.8242	-4.19234	3.96095e-05	0.00108294	1.89261
C1orf101	0.212907	5.26211	4.19076	3.98661e-05	0.00108819	1.88664
ADORA2A	-0.221451	6.50742	-4.18903	4.01488e-05	0.00109413	1.88012
SLC22A18AS	0.190702	5.39044	4.18716	4.04565e-05	0.00110074	1.87306
ENAH	0.223498	8.48324	4.18123	4.14488e-05	0.00112593	1.85068
SLC7A2	0.317541	7.74976	4.18006	4.16469e-05	0.00112747	1.84627
PDE1C	-0.27102	5.4673	-4.18005	4.16494e-05	0.00112747	1.84622
FLOT1	-0.163397	9.1995	-4.17971	4.17062e-05	0.00112747	1.84496
NRSN1	-0.0987764	4.12208	-4.17707	4.21579e-05	0.00113786	1.83501
RPA4	0.359583	6.48517	4.1758	4.23763e-05	0.00114193	1.83024
HK3	-0.322801	6.65423	-4.17379	4.27262e-05	0.00114952	1.82264
LRRC36	0.395715	6.83495	4.17292	4.28774e-05	0.00115175	1.81938
ESX1	-0.0905749	3.81849	-4.17237	4.29742e-05	0.00115251	1.8173
PFKFB4	-0.180519	6.08862	-4.17191	4.30551e-05	0.00115285	1.81556
WDR37	-0.126687	7.72115	-4.16896	4.35752e-05	0.00116381	1.80447
PREX2	0.30417	8.00901	4.1687	4.36219e-05	0.00116381	1.80348
ACR	-0.2409	5.84495	-4.1681	4.37279e-05	0.00116381	1.80124
SLC29A2	-0.147747	6.44348	-4.16761	4.38145e-05	0.00116381	1.79941
TLR8	-0.357563	6.40526	-4.16742	4.3849e-05	0.00116381	1.79869
C14orf1	-0.200484	9.00522	-4.16726	4.38783e-05	0.00116381	1.79807
CXCR1	-0.514633	6.73071	-4.16401	4.44624e-05	0.00117697	1.78586
FBXL18	-0.144619	6.17869	-4.16372	4.45139e-05	0.00117697	1.78479
ATP9B	0.144662	7.49263	4.1629	4.46632e-05	0.00117907	1.7817
CPLX3	-0.168941	4.58975	-4.16245	4.47447e-05	0.00117937	1.78001
CFHR1	0.212993	5.09711	4.16189	4.48476e-05	0.00117999	1.77789
VNN2	-0.498736	7.7235	-4.16156	4.4908e-05	0.00117999	1.77665
ELF2	0.170677	8.33549	4.1607	4.50653e-05	0.00118228	1.77342
STK10	-0.197568	8.25792	-4.15971	4.52473e-05	0.00118521	1.7697
TSKS	0.15815	5.07364	4.15881	4.54116e-05	0.00118767	1.76636
TINF2	-0.141506	9.23857	-4.15673	4.57981e-05	0.00119593	1.75853
COPE	-0.188865	7.88522	-4.15362	4.63802e-05	0.00120872	1.74687
TXLNG	0.271429	7.45747	4.15335	4.64313e-05	0.00120872	1.74585
HBD	0.430813	6.18082	4.15165	4.67532e-05	0.00121522	1.73948
NHEJ1	-0.175658	7.09507	-4.15088	4.68995e-05	0.00121547	1.73659
MMP16	0.293913	5.069	4.15084	4.69069e-05	0.00121547	1.73645
JDP2	-0.239267	8.7953	-4.15011	4.70456e-05	0.0012172	1.73372
LGI4	-0.247773	6.28162	-4.14965	4.71336e-05	0.0012176	1.732
RLN1	-0.175362	4.14858	-4.14816	4.74198e-05	0.00122313	1.72641
ODF2	0.136051	7.73594	4.14555	4.79242e-05	0.00123425	1.71664
EPHA4	0.287349	7.86651	4.14437	4.81533e-05	0.00123826	1.71224
FAF1	0.106317	8.77265	4.14367	4.82916e-05	0.00123937	1.70959
PROK2	-0.529638	6.76654	-4.1434	4.83433e-05	0.00123937	1.7086
NEURL2	-0.224219	5.86652	-4.14191	4.86365e-05	0.00124499	1.70302
BLMH	0.125235	8.12794	4.14139	4.87401e-05	0.00124575	1.70106
RPL35A	0.133969	12.0148	4.13961	4.90928e-05	0.00125223	1.69441
NDRG4	-0.380227	7.16098	-4.13936	4.9142e-05	0.00125223	1.69348
ABR	-0.147254	8.94119	-4.13809	4.93956e-05	0.00125679	1.68873
STK38L	0.216105	8.54083	4.13684	4.96462e-05	0.00126127	1.68406
GNAO1	0.160275	5.07901	4.13602	4.98114e-05	0.00126356	1.68099
TMEM139	-0.272947	6.38518	-4.13539	4.99378e-05	0.00126487	1.67866
HPS1	-0.150627	7.18892	-4.13411	5.0197e-05	0.00126952	1.67388
DGUOK	-0.136297	7.10045	-4.13153	5.0724e-05	0.00128093	1.66424
NQO2	-0.218163	7.26941	-4.13081	5.08714e-05	0.00128274	1.66156
C1orf54	0.229018	7.17314	4.12888	5.12707e-05	0.00129087	1.65435
TLCD1	-0.203847	6.04516	-4.1277	5.15159e-05	0.00129511	1.64995
PCDH12	-0.300752	6.68567	-4.12405	5.22809e-05	0.00131239	1.63635
CLEC18B	-0.150924	5.80733	-4.11821	5.35288e-05	0.00134172	1.61459
TLR6	-0.26867	6.26973	-4.11704	5.37819e-05	0.00134606	1.61023
UBB	0.147772	12.207	4.11658	5.3881e-05	0.00134655	1.60853
TMEM184C	-0.147481	8.7962	-4.11466	5.43011e-05	0.00135405	1.60137
TRAPPC1	-0.177221	8.85217	-4.11447	5.43417e-05	0.00135405	1.60068
PKN3	-0.146689	6.34847	-4.11225	5.483e-05	0.0013642	1.59243
GTF2A1	0.203252	7.95791	4.10993	5.53454e-05	0.00137499	1.5838
ABCC9	0.268253	8.3301	4.10683	5.60408e-05	0.00139022	1.57229
LRRC25	-0.244598	7.08477	-4.105	5.64542e-05	0.00139842	1.56551
ZNF776	0.217175	7.17012	4.10339	5.68231e-05	0.0014055	1.5595
ATRNL1	0.181791	4.15195	4.10188	5.71675e-05	0.00141195	1.55393
ORAOV1	-0.118664	6.75921	-4.1014	5.72779e-05	0.0014126	1.55215
AQP9	-0.487484	9.10223	-4.09907	5.78172e-05	0.00142382	1.54351
SAG	0.174914	4.41621	4.09775	5.81258e-05	0.00142934	1.5386
CEPT1	-0.15833	8.70548	-4.09534	5.86903e-05	0.00144112	1.52969
SULT1B1	-0.410274	6.18046	-4.09256	5.93515e-05	0.00145523	1.51936
SCAF11	0.195549	8.91655	4.09204	5.94752e-05	0.0014559	1.51744
NEUROD6	-0.111035	3.81288	-4.09172	5.95513e-05	0.0014559	1.51626
KCNK15	-0.150748	6.25801	-4.09101	5.97221e-05	0.00145796	1.51362
INPP5A	-0.181282	8.18684	-4.09054	5.98331e-05	0.00145856	1.51191
OTUB1	-0.139275	8.54222	-4.08923	6.01489e-05	0.00146272	1.50705
XIAP	0.292159	7.71288	4.08911	6.01771e-05	0.00146272	1.50662
MGST1	-0.250728	9.39986	-4.08607	6.09172e-05	0.00147858	1.49535
IL13RA2	0.541124	6.03433	4.08479	6.123e-05	0.00148404	1.49063
PTPRD	0.371088	7.11301	4.08229	6.18461e-05	0.00149682	1.4814
MIEN1	-0.150833	8.31322	-4.08002	6.24122e-05	0.00150835	1.47301
MYCBP2	0.201629	9.27106	4.07912	6.26373e-05	0.00151163	1.46969
FBXW7	0.192731	7.40659	4.07483	6.37216e-05	0.0015352	1.45387
LTK	-0.290024	6.06908	-4.07454	6.3796e-05	0.0015352	1.45279
DYRK2	0.128123	7.18092	4.06873	6.52967e-05	0.00156907	1.43137
MFAP3L	0.217165	4.87357	4.06831	6.54068e-05	0.00156948	1.42981
CPNE2	-0.176929	8.88518	-4.06394	6.65573e-05	0.00159482	1.41375
L3MBTL2	-0.112277	7.24492	-4.06356	6.66592e-05	0.001595	1.41234
RNFT1	-0.205737	8.83571	-4.06074	6.74135e-05	0.00161076	1.40197
HAL	-0.326376	5.37658	-4.05924	6.78182e-05	0.00161722	1.39646
UBE2J2	-0.134956	6.49264	-4.05903	6.78757e-05	0.00161722	1.39567
LILRB5	-0.210088	6.43465	-4.05804	6.81449e-05	0.00162135	1.39203
ZC3H4	-0.123054	7.05126	-4.05751	6.82885e-05	0.00162248	1.39009
UBE2I	-0.119711	7.77892	-4.05602	6.8696e-05	0.00162986	1.38461
RASSF2	-0.209054	9.3078	-4.05534	6.88816e-05	0.00163149	1.38212
PRDM4	-0.124611	7.64798	-4.05506	6.89578e-05	0.00163149	1.3811
ALOX5AP	-0.277617	10.1307	-4.05433	6.91603e-05	0.00163398	1.3784
OR10G8	0.16112	4.32642	4.05335	6.94308e-05	0.00163793	1.37481
ZNF385D	0.332755	5.97302	4.05302	6.95214e-05	0.00163793	1.37361
CDKN2B	-0.216622	6.66541	-4.05167	6.9898e-05	0.0016445	1.36863
LOC401357	-0.180715	6.61421	-4.05022	7.03007e-05	0.00165168	1.36334
LMCD1	-0.2879	9.50097	-4.04831	7.08379e-05	0.00166198	1.35633
STX11	-0.287474	8.28864	-4.04777	7.09917e-05	0.00166218	1.35433
CELA1	-0.141253	5.00029	-4.0475	7.10661e-05	0.00166218	1.35336
FAM45A	-0.14193	8.70969	-4.04724	7.1142e-05	0.00166218	1.35238
C1D	-0.207211	8.36338	-4.04659	7.13251e-05	0.00166415	1.35001
PSMB1	-0.144672	9.45032	-4.0461	7.14639e-05	0.00166509	1.34822
MAPKAP1	-0.142209	8.65028	-4.04546	7.16473e-05	0.00166706	1.34586
ITGAX	-0.306378	8.39211	-4.04423	7.19971e-05	0.00167289	1.34138
OSTF1	-0.129872	9.66441	-4.04348	7.22132e-05	0.0016756	1.33862
SNTB2	0.175949	8.72388	4.04231	7.255e-05	0.00168111	1.33433
CARD6	-0.186231	7.5241	-4.04161	7.27536e-05	0.00168124	1.33175
SLC35A4	-0.169968	8.87647	-4.0416	7.27552e-05	0.00168124	1.33173
SNRPC	-0.147003	7.0961	-4.04079	7.29899e-05	0.00168436	1.32876
CAPN1	-0.176637	8.47291	-4.03982	7.32724e-05	0.00168857	1.32521
EVI2B	-0.262439	9.44308	-4.03736	7.39933e-05	0.0017015	1.31619
FLJ40194	-0.183866	4.3948	-4.03721	7.40354e-05	0.0017015	1.31567
CACNA2D1	0.27829	6.58754	4.03624	7.43213e-05	0.00170455	1.31212
MED11	-0.154932	6.90923	-4.03597	7.44014e-05	0.00170455	1.31112
PTGFRN	0.238685	7.57853	4.03574	7.4471e-05	0.00170455	1.31026
MAL	-0.27667	7.75704	-4.03058	7.60108e-05	0.00173743	1.29142
PRAM1	-0.20679	6.75173	-4.02946	7.635e-05	0.00174283	1.28732
ZNF536	0.16707	4.37508	4.02654	7.72391e-05	0.00176074	1.27666
RBAK	0.265333	6.83971	4.02388	7.80591e-05	0.00177703	1.26694
EME2	-0.166121	6.71019	-4.02319	7.82714e-05	0.00177946	1.26444
CNIH4	-0.163548	9.52091	-4.02285	7.83785e-05	0.0017795	1.26318
LRP6	0.224	8.73047	4.02246	7.84981e-05	0.00177982	1.26178
NPHP3	0.173236	8.14473	4.0198	7.93299e-05	0.00179285	1.25207
RTN1	-0.219694	6.60819	-4.01978	7.93363e-05	0.00179285	1.252
LAPTM5	-0.191224	11.4349	-4.01956	7.94048e-05	0.00179285	1.2512
RUNDC3B	0.39094	5.37575	4.01927	7.94978e-05	0.00179285	1.25013
WDR59	0.119615	7.90503	4.01775	7.99779e-05	0.00180126	1.24459
SREBF2	-0.1507	8.51575	-4.01736	8.0102e-05	0.00180147	1.24316
MFN2	-0.113589	9.43274	-4.01704	8.02005e-05	0.00180147	1.24203
FBXO34	0.172245	8.49273	4.01548	8.06973e-05	0.00181022	1.23634
CCDC85A	-0.277265	6.45882	-4.01487	8.0893e-05	0.0018122	1.23411
RASGRP4	-0.19472	5.85394	-4.01174	8.1901e-05	0.00183234	1.22272
HOXA13	-0.084392	5.00508	-4.01137	8.20216e-05	0.00183261	1.22136
CHRM1	-0.186058	5.35657	-4.01004	8.24525e-05	0.0018398	1.21654
YPEL2	0.151219	7.93106	4.00902	8.2786e-05	0.00184481	1.21283
GPRC6A	-0.147445	3.48536	-4.00862	8.29187e-05	0.00184489	1.21135
RNF113B	-0.205413	5.03773	-4.00834	8.30083e-05	0.00184489	1.21036
MPL	-0.152486	5.05176	-4.00731	8.33467e-05	0.00184997	1.20662
COL9A1	0.153763	5.03106	4.00479	8.41812e-05	0.00186493	1.19745
P2RY13	-0.349253	6.74375	-4.0045	8.42798e-05	0.00186493	1.19637
ERCC6	0.17083	7.19989	4.00428	8.43526e-05	0.00186493	1.19558
FREM1	0.269695	6.62903	4.0034	8.46438e-05	0.00186653	1.1924
DSEL	-0.326381	6.85976	-4.0034	8.4646e-05	0.00186653	1.19238
TLK2	0.17214	8.74883	4.00302	8.47718e-05	0.00186686	1.19101
RIPK3	-0.130118	6.68101	-4.00245	8.49626e-05	0.00186862	1.18895
XKR8	-0.110259	6.67733	-3.9957	8.72569e-05	0.00191587	1.16443
INPP4A	0.141948	7.78951	3.99546	8.73379e-05	0.00191587	1.16358
KCNAB2	-0.208073	7.90234	-3.99487	8.75412e-05	0.00191783	1.16144
IL12A	-0.26273	4.67912	-3.99437	8.7713e-05	0.00191898	1.15963
MICB	-0.174636	7.21023	-3.99406	8.78209e-05	0.00191898	1.1585
PSMC2	-0.143005	10.0432	-3.99355	8.79981e-05	0.00191935	1.15665
PARP3	-0.146301	7.05276	-3.99336	8.80657e-05	0.00191935	1.15594
PAWR	0.259987	8.19082	3.99242	8.83894e-05	0.0019227	1.15257
CEP97	0.231636	6.70233	3.99226	8.84471e-05	0.0019227	1.15197
RSPO1	-0.229025	6.12258	-3.99149	8.87164e-05	0.00192571	1.14917
PLXNA4	0.199915	5.98685	3.99121	8.88138e-05	0.00192571	1.14816
ZNF607	0.14745	6.04604	3.98959	8.93817e-05	0.00193553	1.1423
AHCYL1	0.136827	9.7435	3.9891	8.95548e-05	0.00193679	1.14052
CCDC125	0.318996	7.9359	3.98833	8.9827e-05	0.00194019	1.13773
HNRNPU	0.135892	10.3474	3.98619	9.05844e-05	0.00195405	1.13
PLD6	-0.126238	6.1042	-3.98446	9.12031e-05	0.00196489	1.12374
FRMPD4	-0.127168	4.07312	-3.98252	9.19021e-05	0.00197742	1.11672
IPMK	0.29987	6.76037	3.98133	9.23327e-05	0.00198348	1.11242
KIAA0196	-0.185624	8.55645	-3.9811	9.24189e-05	0.00198348	1.11156
PTPN3	0.207773	7.4864	3.98074	9.25497e-05	0.00198376	1.11026
ARHGEF38	0.341145	6.65742	3.97818	9.34847e-05	0.00200126	1.10102
PLEKHM2	-0.152474	8.46895	-3.97654	9.40876e-05	0.00201161	1.09511
SEC14L2	0.182272	5.72496	3.97539	9.45146e-05	0.00201818	1.09095
ANKRD36B	0.316994	9.32511	3.97492	9.46877e-05	0.00201933	1.08926
SCARNA17	0.338918	11.1837	3.97364	9.51649e-05	0.00202694	1.08464
MYH11	0.407741	10.3611	3.97183	9.5846e-05	0.00203887	1.07808
BAP1	-0.133161	7.88673	-3.97072	9.62611e-05	0.00204471	1.07411
CCDC136	0.16782	4.87774	3.97046	9.63626e-05	0.00204471	1.07314
WFDC10B	-0.203019	5.19703	-3.96899	9.69173e-05	0.00205177	1.06786
SORBS3	-0.136717	7.69493	-3.96893	9.6939e-05	0.00205177	1.06766
PHGDH	-0.311373	7.17221	-3.96696	9.76932e-05	0.00206515	1.06053
CEBPB	-0.190307	9.17633	-3.96403	9.88223e-05	0.00208494	1.04997
TMEM119	-0.310232	6.65344	-3.96361	9.89831e-05	0.00208494	1.04847
MGC24103	0.304981	6.71944	3.96357	9.90003e-05	0.00208494	1.04831
PCCA	0.1447	7.87072	3.96268	9.93457e-05	0.0020896	1.04511
DENND1C	-0.155093	6.43643	-3.96195	9.96275e-05	0.00209202	1.04251
PHACTR3	-0.247375	6.43904	-3.96175	9.97085e-05	0.00209202	1.04176
NEO1	0.194167	8.78963	3.96048	0.000100203	0.0020983	1.03721
TECPR2	-0.105649	7.06581	-3.96028	0.000100281	0.0020983	1.0365
H2AFV	0.128111	8.90798	3.96003	0.000100381	0.0020983	1.03558
HIST1H2BK	-0.189708	9.00154	-3.95799	0.000101187	0.00210999	1.02823
KIF16B	0.206433	7.50712	3.95777	0.000101275	0.00210999	1.02744
OR8K3	-0.105215	3.58515	-3.95766	0.000101315	0.00210999	1.02707
KIF3A	0.223873	7.2736	3.95671	0.000101693	0.00211421	1.02365
CDA	-0.200681	6.03528	-3.95651	0.000101774	0.00211421	1.02291
GOLGA6A	-0.122382	4.89486	-3.95621	0.000101894	0.00211421	1.02183
ZNF337	0.139941	7.2821	3.95534	0.00010224	0.00211878	1.01871
PCM1	0.19225	9.45513	3.95383	0.000102847	0.00212832	1.01328
C5orf38	-0.204386	5.94053	-3.95328	0.000103067	0.00212832	1.01131
FMNL1	-0.182433	7.44229	-3.95325	0.000103079	0.00212832	1.0112
ARFGAP2	-0.128817	7.9943	-3.95246	0.000103397	0.00213228	1.00837
SLC25A16	-0.165461	7.88196	-3.94977	0.000104493	0.00215224	0.998687
RAPGEF6	0.201887	7.92826	3.94939	0.000104646	0.00215277	0.997339
C20orf24	-0.165791	8.24283	-3.94849	0.000105015	0.00215774	0.994101
CCDC50	0.120486	9.0676	3.94497	0.000106467	0.00218491	0.981484
AKR1C4	-0.109633	3.30726	-3.9444	0.000106704	0.0021871	0.979445
SLC22A23	0.213351	7.39518	3.94303	0.000107277	0.00219569	0.974527
RPS5	-0.239033	9.41496	-3.94278	0.000107383	0.00219569	0.973615
FADD	-0.113875	7.33668	-3.94111	0.000108082	0.00220475	0.967651
TRAF5	0.218422	7.34299	3.9411	0.000108088	0.00220475	0.967605
AMN1	-0.220394	6.51058	-3.93969	0.000108683	0.00221402	0.96256
TM7SF2	-0.163771	7.07755	-3.93941	0.000108804	0.00221402	0.961535
POTEM	-0.127355	10.1404	-3.93899	0.000108982	0.00221496	0.960036
GALNT13	-0.297496	4.15942	-3.93801	0.000109399	0.00222077	0.956524
ECM2	0.321363	7.10192	3.93698	0.000109837	0.00222697	0.952857
GORASP2	-0.161143	8.7979	-3.93657	0.000110013	0.00222746	0.951384
LST1	-0.239576	8.55328	-3.93631	0.000110125	0.00222746	0.95045
VENTX	-0.199992	5.95087	-3.93586	0.000110318	0.00222868	0.948845
DHTKD1	-0.157905	7.27888	-3.93321	0.000111461	0.00224761	0.93937
TFG	-0.146833	9.08368	-3.93252	0.000111763	0.00224761	0.93689
TMUB2	-0.119506	7.31826	-3.93247	0.000111783	0.00224761	0.936723
RBFOX2	0.158875	8.79897	3.93237	0.000111828	0.00224761	0.936355
COPZ1	-0.120762	9.65066	-3.93216	0.000111921	0.00224761	0.935591
GPR4	-0.278936	6.98726	-3.9306	0.0001126	0.00225638	0.930032
PIK3AP1	-0.283562	7.28833	-3.93035	0.000112711	0.00225638	0.929131
C15orf62	-0.172448	5.27962	-3.93024	0.000112759	0.00225638	0.928737
PCYT2	-0.182666	7.35503	-3.92869	0.000113441	0.00226734	0.9232
WHSC1	0.117373	6.77219	3.92659	0.000114374	0.00228328	0.915676
DYSF	-0.229646	7.58941	-3.92541	0.000114896	0.002291	0.911492
ATP6V1G1	-0.109037	9.39501	-3.92365	0.000115689	0.00230408	0.905176
DDX17	0.204357	11.0018	3.92316	0.00011591	0.00230575	0.903427
ZNF318	0.163374	6.76671	3.9187	0.000117933	0.00234323	0.887537
TMED7-TICAM2	-0.170776	7.80088	-3.91779	0.000118352	0.00234563	0.884281
GSK3A	-0.115197	8.51411	-3.91753	0.000118469	0.00234563	0.883369
KIF13B	0.133668	8.55447	3.91753	0.000118471	0.00234563	0.883358
KLHL13	0.281815	5.60035	3.91655	0.000118921	0.00235179	0.879875
ARHGAP4	-0.176056	8.04353	-3.91605	0.000119154	0.00235259	0.878073
LPCAT3	-0.213365	9.9319	-3.91576	0.000119288	0.00235259	0.877047
LTBR	-0.14015	8.31689	-3.91551	0.000119402	0.00235259	0.876166
RAB15	-0.181171	6.76093	-3.91526	0.000119519	0.00235259	0.875265
EPAS1	-0.237951	11.9522	-3.91241	0.000120847	0.0023749	0.865125
SLC25A20	-0.17388	7.20071	-3.91223	0.000120934	0.0023749	0.864458
ZNF587	0.134144	8.23829	3.91148	0.000121286	0.00237903	0.861796
LARS	0.210285	9.29472	3.90724	0.000123295	0.00241316	0.846712
EHD1	-0.23624	7.34236	-3.9072	0.000123311	0.00241316	0.846588
TMCO6	-0.131015	6.69244	-3.90654	0.000123628	0.00241654	0.844237
PKN2	0.19594	9.3273	3.90574	0.000124011	0.00242123	0.841393
RAB39B	0.214715	5.34234	3.9045	0.00012461	0.00242783	0.836972
CARHSP1	-0.169213	7.94392	-3.90444	0.000124637	0.00242783	0.836774
UMODL1	-0.154266	4.57129	-3.90288	0.000125393	0.00243973	0.831225
CNDP1	-0.148055	4.39826	-3.90241	0.00012562	0.00244134	0.82956
SYT11	0.170318	7.29355	3.8992	0.000127193	0.00246907	0.818138
SLC4A4	0.283255	8.28658	3.89827	0.000127653	0.00247515	0.814826
MS4A6A	-0.264694	8.96426	-3.89788	0.000127843	0.00247598	0.813464
CORO6	-0.186533	6.2843	-3.89747	0.000128045	0.00247705	0.812014
STAT4	0.287651	7.10686	3.8962	0.000128676	0.00248161	0.807501
KRTAP1-5	-0.0807852	5.12549	-3.8962	0.000128679	0.00248161	0.807482
OBFC1	-0.16831	7.94868	-3.89611	0.000128722	0.00248161	0.807172
MRPS18C	-0.185794	6.24833	-3.89464	0.000129454	0.0024924	0.801967
MTRF1L	-0.185543	7.33895	-3.8944	0.000129577	0.0024924	0.801095
LINC00478	0.239628	6.0833	3.89287	0.000130341	0.00250425	0.795698
EPHX3	-0.171968	6.29295	-3.89166	0.000130951	0.0025127	0.791414
DOK2	-0.236435	7.29476	-3.89141	0.000131079	0.0025127	0.790519
TTC17	0.126777	9.27658	3.88957	0.000132016	0.0025269	0.783986
OR6W1P	0.144971	4.55517	3.88937	0.00013212	0.0025269	0.783265
ITPRIPL1	0.160441	5.2647	3.888	0.000132816	0.00253735	0.778437
USP5	-0.158829	7.22785	-3.88622	0.000133733	0.00255197	0.772127
CBX5	0.209399	9.02463	3.88564	0.000134034	0.00255411	0.770065
LILRB1	-0.299283	6.54241	-3.88537	0.000134171	0.00255411	0.769129
USHBP1	-0.183848	6.06811	-3.88512	0.000134299	0.00255411	0.768249
TMEM209	-0.138423	8.06423	-3.88379	0.000134992	0.0025644	0.763528
KIF1C	-0.141393	8.28995	-3.88349	0.00013515	0.0025645	0.762458
MSH3	0.183713	8.09132	3.88319	0.000135303	0.00256452	0.76142
SEC24C	-0.134193	7.88841	-3.88273	0.000135543	0.00256619	0.759793
SEC23B	-0.172997	9.08891	-3.88226	0.000135791	0.002568	0.758117
EPS8	0.269434	9.75853	3.88049	0.000136723	0.00258274	0.751838
TRIO	0.137347	8.75275	3.87961	0.000137183	0.00258853	0.748756
GPR17	-0.149262	5.07789	-3.87761	0.000138248	0.00260571	0.741662
RIC8A	-0.106829	8.78671	-3.87628	0.000138957	0.00261614	0.736973
ARID5B	0.230311	9.78735	3.87582	0.000139204	0.00261787	0.735345
DMBX1	-0.128738	5.33511	-3.87327	0.000140577	0.00263754	0.726341
ACE2	0.317335	5.83235	3.87322	0.000140603	0.00263754	0.726171
PIGH	-0.160866	6.01585	-3.87301	0.000140719	0.00263754	0.725416
ARHGAP9	-0.171744	7.02346	-3.87139	0.000141595	0.00265102	0.719722
TIA1	0.18494	9.64275	3.8711	0.000141755	0.00265108	0.718684
PRMT6	-0.149654	6.06366	-3.87049	0.000142087	0.00265433	0.716542
PDSS1	-0.215744	7.21238	-3.87009	0.000142308	0.00265553	0.715113
ANTXR1	0.209918	9.54343	3.86816	0.000143366	0.00267231	0.708322
LOC643797	-0.10805	5.468	-3.86731	0.000143834	0.00267543	0.705336
XPOT	-0.225159	8.5426	-3.86728	0.000143851	0.00267543	0.705226
MTOR	-0.107525	8.0578	-3.86633	0.00014438	0.00268232	0.701859
TOE1	-0.133808	6.88619	-3.86225	0.000146661	0.0027217	0.687483
ANK3	0.228096	8.12606	3.8611	0.000147306	0.00273066	0.683461
GSTA4	-0.241071	7.94969	-3.85901	0.000148493	0.00274964	0.676102
ZC3H11A	0.146913	9.766	3.85816	0.000148982	0.00275568	0.673086
KRTAP12-2	-0.133715	5.61009	-3.85744	0.00014939	0.0027602	0.670578
CACNA2D3	-0.287048	5.4924	-3.85652	0.000149919	0.00276695	0.667336
FLNC	0.289261	6.74723	3.85526	0.000150649	0.00277656	0.662887
LILRA1	-0.272424	6.05369	-3.85484	0.00015089	0.00277656	0.66142
CLMP	0.209177	8.15327	3.85455	0.000151057	0.00277656	0.660405
ARL2BP	-0.111113	9.56709	-3.85448	0.000151098	0.00277656	0.660154
FAM65B	-0.303784	7.336	-3.85293	0.000151997	0.00279004	0.654715
PPP3CA	0.137789	9.6884	3.85136	0.000152916	0.00280384	0.649193
PRX	-0.270931	6.52379	-3.85004	0.000153687	0.00281493	0.644578
HPSE2	0.314652	5.96244	3.84882	0.000154407	0.00282505	0.640296
SLC26A6	-0.136513	6.37401	-3.84762	0.000155121	0.00283503	0.636068
HHAT	0.160661	6.77307	3.84731	0.000155307	0.00283514	0.634972
MYO1G	-0.262838	7.19811	-3.84704	0.000155463	0.00283514	0.634048
BCL2L1	-0.179928	9.31602	-3.84618	0.00015598	0.00284149	0.631008
TMEM41B	-0.202448	8.4821	-3.84493	0.000156725	0.00285199	0.626637
FLOT2	-0.161389	8.32945	-3.84446	0.00015701	0.0028541	0.624971
PSMB7	-0.104857	9.64052	-3.84237	0.00015827	0.00287234	0.617647
ACOT13	-0.155615	7.99696	-3.84223	0.000158354	0.00287234	0.617162
MYL12A	-0.14781	8.61931	-3.84166	0.000158698	0.00287369	0.615171
DAZAP2	-0.14793	11.4412	-3.84155	0.000158769	0.00287369	0.614762
RPL22L1	-0.255701	6.97648	-3.83926	0.000160161	0.00289577	0.606763
RRAGB	0.139939	6.98956	3.83858	0.000160577	0.00290018	0.604388
HLA-DPB1	0.268872	11.6516	3.83771	0.000161117	0.00290682	0.60131
RIMKLB	0.247884	8.21346	3.83721	0.00016142	0.00290918	0.599587
KCNK3	-0.249839	6.71333	-3.83557	0.000162439	0.00292442	0.593822
C1QTNF9	-0.237557	4.00603	-3.83421	0.000163279	0.00293641	0.589093
KIAA1109	0.207754	9.11497	3.83391	0.000163471	0.00293673	0.588019
VEZF1	0.121063	8.98293	3.83321	0.000163907	0.00294143	0.585578
PQBP1	-0.147833	7.70929	-3.83124	0.000165142	0.00296044	0.5787
CAP1	-0.125635	11.1747	-3.83	0.000165928	0.00297138	0.574346
CPNE8	-0.181625	7.80542	-3.82961	0.000166176	0.00297266	0.572981
ASGR2	-0.178293	5.83433	-3.82793	0.000167243	0.0029879	0.567113
C12orf49	-0.1783	8.6797	-3.82771	0.000167382	0.0029879	0.566354
ZNF746	-0.104669	8.10024	-3.82644	0.000168196	0.00299925	0.561913
AHDC1	0.185109	6.31444	3.82529	0.000168933	0.00300922	0.557905
MGEA5	0.200954	9.80437	3.82483	0.000169233	0.00301138	0.556279
ZNF296	-0.130846	5.85378	-3.82186	0.000171158	0.00304243	0.545919
LRG1	-0.249057	6.60664	-3.82003	0.000172351	0.0030604	0.539558
SETD2	0.169744	9.15023	3.81941	0.000172761	0.003064	0.537379
TCEB3B	-0.118868	3.84548	-3.81871	0.000173219	0.003064	0.534952
MAVS	-0.168661	7.55133	-3.8187	0.000173231	0.003064	0.534892
MFNG	-0.22109	7.56454	-3.81862	0.00017328	0.003064	0.534632
MBD6	-0.143501	7.41724	-3.81788	0.000173773	0.0030695	0.532032
IFNK	-0.112303	3.60325	-3.81634	0.000174792	0.00308428	0.526672
MMP7	0.584499	8.34814	3.81434	0.000176124	0.00310452	0.519723
TYRO3	-0.182514	6.38262	-3.81376	0.000176517	0.00310822	0.517678
OR8H1	-0.212498	3.36307	-3.81206	0.000177656	0.00312345	0.511787
LINC00471	0.166589	4.53673	3.81192	0.000177753	0.00312345	0.51129
ADSS	0.146601	8.38934	3.81163	0.000177951	0.00312368	0.510271
NDUFB10	-0.14739	7.93153	-3.81075	0.000178549	0.00313047	0.507196
MORC4	0.135089	7.39222	3.81051	0.000178709	0.00313047	0.506378
LRRC32	-0.382596	8.49398	-3.80898	0.000179753	0.00314244	0.501044
FAM65C	-0.173148	5.26918	-3.8089	0.000179805	0.00314244	0.500779
MLLT3	0.187203	7.34959	3.80857	0.000180033	0.00314244	0.499621
VEGFC	-0.256049	7.79445	-3.80834	0.00018019	0.00314244	0.498821
ITGB6	0.328482	9.39888	3.80814	0.000180324	0.00314244	0.498142
IFFO1	-0.128865	6.78526	-3.80658	0.000181394	0.00315782	0.492724
CEACAM3	-0.199893	6.25476	-3.80622	0.000181645	0.00315894	0.491455
METTL8	0.105894	6.48771	3.80435	0.000182941	0.00317819	0.484948
MYOM1	0.205317	5.5507	3.80375	0.000183354	0.00318209	0.482884
GNPDA1	-0.197607	7.32813	-3.80313	0.000183786	0.00318632	0.480728
PRDM7	-0.1882	4.56173	-3.80116	0.000185169	0.00320699	0.473864
NAAA	-0.163565	7.92584	-3.79973	0.000186174	0.0032211	0.468907
LOC729164	0.131789	5.28334	3.79778	0.000187557	0.00324169	0.462134
SMEK1	0.112099	8.67659	3.79635	0.000188571	0.00325589	0.457197
USF2	-0.155285	8.22447	-3.79559	0.000189119	0.00326201	0.454543
POLR2K	-0.137273	9.20303	-3.79298	0.000190993	0.00329097	0.445514
GNG10	-0.193847	9.85938	-3.7918	0.000191854	0.00329962	0.441396
OCIAD1	0.143727	8.72766	3.79153	0.000192049	0.00329962	0.440467
SIRPB2	-0.237716	6.50738	-3.79148	0.000192082	0.00329962	0.440311
MAPK8	0.139324	8.22837	3.79007	0.00019311	0.00331392	0.435424
PMEPA1	0.197116	8.27911	3.7868	0.000195518	0.00335182	0.424083
CLK1	0.257083	10.0499	3.78573	0.000196308	0.00336196	0.420392
PCNX	0.129494	9.34593	3.78366	0.000197847	0.00338128	0.413249
SLCO1C1	0.109464	4.24936	3.78355	0.000197931	0.00338128	0.412858
LPAL2	0.129759	4.32042	3.78341	0.000198038	0.00338128	0.412363
HMGB3P1	0.182648	5.0539	3.78277	0.000198517	0.00338604	0.410152
PAMR1	0.373812	6.86804	3.78195	0.000199129	0.00339181	0.407336
CEP290	0.266531	6.66335	3.78166	0.000199353	0.00339181	0.406307
CETN1	-0.0871954	3.74479	-3.78152	0.000199459	0.00339181	0.405821
CD180	-0.38625	5.75372	-3.77969	0.000200844	0.00341191	0.399492
GOLPH3	-0.0950604	9.47127	-3.77866	0.000201624	0.00342173	0.395943
CALB2	0.426521	5.81688	3.77722	0.000202724	0.00343693	0.390967
TRIM16L	-0.233277	7.83961	-3.77578	0.000203828	0.00345218	0.385997
ZNF711	0.238049	5.496	3.77518	0.000204285	0.00345645	0.383949
SFRP4	0.539352	7.85459	3.77248	0.000206379	0.00348838	0.37462
KCTD21	-0.150327	6.03269	-3.77205	0.000206715	0.00349057	0.373128
PDPN	-0.191455	7.76187	-3.76796	0.000209921	0.00354116	0.359051
EXT2	0.0984213	8.82847	3.7666	0.000211007	0.00355388	0.354332
PLA2G3	-0.177665	5.46856	-3.76648	0.000211096	0.00355388	0.353944
IFITM2	-0.184286	9.1565	-3.76603	0.000211455	0.00355618	0.352392
DUSP18	-0.178477	6.74361	-3.76578	0.000211655	0.00355618	0.351529
PDE8B	0.334904	7.21082	3.76513	0.000212178	0.00356143	0.34927
CYSLTR1	0.246801	6.86185	3.76388	0.000213172	0.00357455	0.344996
NDUFS2	-0.121787	8.91615	-3.7618	0.000214852	0.00359915	0.337815
GPIHBP1	-0.331355	7.47726	-3.76063	0.000215798	0.0036114	0.3338
HMGN4	-0.130405	8.31395	-3.7603	0.000216066	0.00361231	0.332661
SMOC1	0.148782	5.57109	3.75964	0.000216604	0.00361772	0.330387
KLF4	-0.342202	9.32496	-3.7585	0.000217534	0.00362965	0.326471
AKAP6	0.223083	6.25133	3.75778	0.00021812	0.00363014	0.324009
TMEM45B	-0.283367	7.5903	-3.75773	0.000218164	0.00363014	0.323824
VASH2	0.166506	5.99021	3.75768	0.000218209	0.00363014	0.323639
IQCA1	0.261412	6.30519	3.75685	0.000218885	0.0036378	0.320811
C1orf100	0.111896	3.8083	3.75564	0.000219881	0.00364755	0.316658
MON2	0.147549	9.00142	3.75562	0.000219904	0.00364755	0.316562
RPRM	0.237161	4.86327	3.75523	0.000220221	0.00364922	0.315244
ANKRD19P	-0.166799	4.12858	-3.75295	0.000222119	0.00367706	0.307397
CRLF1	-0.275336	7.86937	-3.75179	0.000223088	0.00368947	0.30342
DOK3	-0.191099	6.36147	-3.74991	0.000224667	0.00371162	0.29697
PSMD9	-0.161227	6.4833	-3.74967	0.000224867	0.00371162	0.296158
QRICH1	-0.0956615	9.34751	-3.74939	0.000225105	0.00371193	0.295189
OR7E14P	-0.163815	8.16459	-3.7462	0.000227819	0.00375243	0.284234
FIP1L1	0.0935383	8.61451	3.74598	0.000228007	0.00375243	0.283481
ZKSCAN1	0.183533	8.61746	3.7456	0.000228329	0.00375408	0.282189
MPP3	-0.290271	7.22878	-3.74474	0.000229065	0.00376251	0.279246
GPRASP1	0.195255	6.69604	3.74389	0.000229802	0.00377095	0.27631
KLF17	-0.169078	4.87222	-3.74328	0.000230326	0.00377588	0.274227
STX3	-0.177352	7.98923	-3.74274	0.000230792	0.00377983	0.272383
MIS12	-0.190414	7.12308	-3.74112	0.000232195	0.00379912	0.266842
IL17RB	-0.265206	5.36778	-3.7404	0.000232826	0.00380575	0.264363
SIRPA	-0.157907	7.91185	-3.7398	0.000233343	0.00380846	0.262334
HMGCS1	-0.2998	9.27355	-3.73946	0.000233646	0.00380846	0.261149
TMC2	-0.141809	4.03173	-3.73926	0.000233821	0.00380846	0.260462
CLTA	-0.119794	8.82113	-3.73917	0.000233894	0.00380846	0.260178
INTS10	0.126243	8.92336	3.73722	0.000235614	0.00382956	0.253484
TICAM1	-0.146423	6.63532	-3.73718	0.000235644	0.00382956	0.253364
NRTN	0.20354	5.86315	3.73674	0.000236032	0.00383217	0.251862
PITPNM2	-0.183061	6.26431	-3.73546	0.000237171	0.00384695	0.247464
ATP2B1	0.185765	9.01957	3.73427	0.000238227	0.00386037	0.243404
RBM39	0.145531	10.8935	3.73297	0.000239387	0.00386961	0.238965
HEATR4	-0.187649	4.556	-3.73297	0.000239389	0.00386961	0.238957
OR10C1	0.154912	4.31689	3.73286	0.000239485	0.00386961	0.238589
LRRC17	0.364736	6.00756	3.73153	0.000240678	0.00388517	0.234048
HTATSF1P2	-0.291005	6.14523	-3.73103	0.000241135	0.00388771	0.232315
ACOT1	-0.200272	7.45137	-3.73085	0.000241297	0.00388771	0.231702
RSRC1	0.174764	8.04299	3.72957	0.000242449	0.00389652	0.227349
ZNF292	0.250548	9.08732	3.7295	0.000242513	0.00389652	0.227109
FLVCR2	-0.276578	7.46488	-3.72948	0.000242536	0.00389652	0.227021
ZFP42	-0.217125	3.75684	-3.72882	0.000243132	0.00390237	0.22478
ATP6V1C1	-0.186196	8.62982	-3.72572	0.000245962	0.00394404	0.214207
BRI3	-0.171778	9.7818	-3.72509	0.000246539	0.00394954	0.212066
ATP13A1	-0.138372	7.61909	-3.72373	0.000247797	0.00396332	0.207416
ALPPL2	-0.154305	5.99443	-3.72365	0.000247869	0.00396332	0.20715
GMPPA	-0.160146	7.10196	-3.7227	0.000248753	0.00397368	0.203899
KLHL4	0.255732	5.26668	3.72174	0.000249644	0.00398171	0.200632
KDM1A	0.132748	8.28263	3.72165	0.000249727	0.00398171	0.200327
PECAM1	-0.184198	11.6461	-3.7208	0.000250525	0.00398764	0.197414
LYSMD4	-0.148075	6.15788	-3.72075	0.000250572	0.00398764	0.197241
GABARAPL2	0.159936	9.78666	3.72035	0.000250945	0.00398981	0.195883
ZNF528	0.235026	6.48048	3.72006	0.00025121	0.00399027	0.194918
PCSK5	0.157374	7.95435	3.71807	0.000253084	0.00401625	0.18813
PCCB	-0.148323	7.93738	-3.71741	0.000253705	0.00401904	0.185892
INSL6	-0.0907824	3.62137	-3.71738	0.000253736	0.00401904	0.185778
LIMS2	-0.18133	7.64117	-3.71478	0.000256208	0.00405438	0.176924
DHCR7	-0.251188	8.51624	-3.71314	0.000257779	0.00407542	0.171341
COL6A3	0.335857	10.1646	3.71279	0.000258118	0.00407697	0.170139
HNRNPH1	0.132329	10.8113	3.71186	0.000259009	0.00408721	0.166993
AMIGO1	-0.158523	6.22399	-3.70981	0.000260993	0.00411466	0.160026
ADH1A	-0.238937	8.66572	-3.70813	0.000262627	0.00413656	0.154326
PCDH19	0.196953	4.60445	3.7	0.000270686	0.00425951	0.126729
SPAG9	0.165253	9.62782	3.69823	0.000272476	0.00428369	0.12071
AHCYL2	0.246645	9.87343	3.69676	0.000273966	0.0043031	0.115732
PPP1R2	0.0995444	8.59019	3.69504	0.000275716	0.00432656	0.10992
CPXM2	0.339877	6.86241	3.69468	0.000276085	0.00432833	0.108698
MPDU1	-0.176433	9.06867	-3.69338	0.00027742	0.00433905	0.104296
PODXL	-0.220435	9.87151	-3.69331	0.000277499	0.00433905	0.104035
SLC35C1	-0.190211	7.28103	-3.69295	0.000277861	0.00433905	0.102845
MAFB	-0.192214	8.37885	-3.69288	0.00027794	0.00433905	0.102586
IL9	-0.0822385	4.1793	-3.69277	0.000278055	0.00433905	0.102208
RAB4A	0.129813	7.74655	3.69136	0.000279513	0.00435776	0.0974364
ZNF521	0.300369	7.42101	3.68927	0.000281687	0.00438761	0.0903644
TIMP3	-0.229624	11.4721	-3.68858	0.000282405	0.00439473	0.0880405
C16orf89	0.277283	9.55969	3.68776	0.000283259	0.00440396	0.0852845
JMJD1C	0.231208	9.7255	3.68614	0.000284969	0.00442646	0.0797933
PYGL	-0.190372	8.92447	-3.68449	0.000286717	0.00444632	0.0742122
SESTD1	0.221214	9.09734	3.68437	0.000286846	0.00444632	0.0737998
RXRG	-0.211501	4.63579	-3.68419	0.000287038	0.00444632	0.0731899
MGAT1	-0.154216	8.33987	-3.6837	0.000287555	0.00444821	0.071547
OR4F4	-0.106996	3.50237	-3.68357	0.000287687	0.00444821	0.071128
RPS3A	0.153653	11.3618	3.68304	0.000288254	0.00445289	0.0693327
FCN1	-0.302934	7.95157	-3.68233	0.000289013	0.00446053	0.066934
SORBS2	0.211988	7.50182	3.68176	0.000289628	0.00446593	0.0649948
FBXO32	0.331184	7.31043	3.68068	0.000290782	0.00447964	0.0613652
YLPM1	0.115369	8.64699	3.68004	0.000291472	0.00448616	0.0592039
DTNA	0.173067	6.57143	3.67955	0.000292007	0.00449031	0.0575295
RNF5	-0.139443	8.72824	-3.67652	0.000295291	0.00453666	0.0473272
SLITRK2	-0.150835	4.5649	-3.67622	0.00029562	0.0045376	0.0463087
SLCO2A1	-0.317627	9.88731	-3.67379	0.000298285	0.00457433	0.0381232
LSM10	-0.154415	7.44477	-3.67275	0.00029944	0.00458788	0.0345972
MYO1C	-0.143484	9.92258	-3.67032	0.000302139	0.00462503	0.0264122
PRSS12	0.344676	7.04871	3.67006	0.000302421	0.00462515	0.02556
PCDH1	-0.150215	7.73135	-3.66886	0.00030377	0.00463802	0.0215015
RBM15	0.154471	7.87758	3.66868	0.000303969	0.00463802	0.0209025
PPM1N	-0.154319	5.8523	-3.66857	0.000304087	0.00463802	0.0205478
SOCS4	-0.235356	6.7373	-3.66641	0.000306521	0.00467092	0.0132774
C1R	-0.203351	10.9394	-3.66588	0.000307121	0.00467583	0.0114948
CHIC1	0.188737	6.33363	3.66521	0.000307887	0.00468328	0.00922076
CATSPERG	-0.13136	5.01562	-3.66398	0.000309288	0.00470034	0.00508265
CDK14	0.145688	8.36729	3.66334	0.00031001	0.00470571	0.00295601
ITGB8	0.260312	6.82303	3.66305	0.000310349	0.00470571	0.00195765
VSTM2A	-0.0872695	4.42035	-3.66271	0.000310739	0.00470571	0.000813048
AK2	0.10552	8.34713	3.66269	0.000310757	0.00470571	0.000759438
TPP1	-0.17586	9.22197	-3.66185	0.000311719	0.00471605	-0.00205937
GCSH	-0.160651	7.7661	-3.65977	0.000314113	0.004748	-0.00903439
NLRC4	-0.31921	6.83939	-3.65804	0.000316122	0.00477178	-0.0148484
CAV3	-0.172593	5.19584	-3.65788	0.000316317	0.00477178	-0.01541
SVOPL	0.195147	5.18899	3.65768	0.000316538	0.00477178	-0.0160493
DTNB	0.143584	6.88545	3.65745	0.000316818	0.00477178	-0.0168532
WSB2	-0.159121	9.06417	-3.65704	0.000317291	0.00477465	-0.0182144
FAM13C	0.330315	6.97211	3.6567	0.000317693	0.00477643	-0.0193678
EIF3H	0.105838	10.3804	3.65628	0.000318174	0.00477941	-0.0207494
OLAH	-0.301074	4.05627	-3.6558	0.000318743	0.00478369	-0.0223768
KSR1	0.183765	6.91386	3.65509	0.000319571	0.00478973	-0.0247423
HELZ	0.158721	9.3521	3.65497	0.000319713	0.00478973	-0.0251474
VGLL3	-0.230888	8.41543	-3.65423	0.000320589	0.00479859	-0.0276424
PRSS16	-0.128948	5.95323	-3.65339	0.00032158	0.00480621	-0.030458
HAUS4	-0.139084	7.89474	-3.6532	0.000321804	0.00480621	-0.0310932
PRUNE2	0.347447	6.07971	3.65308	0.000321953	0.00480621	-0.0315132
ETNK2	-0.177775	5.21474	-3.6526	0.000322514	0.00481034	-0.0331014
MYO3A	0.121872	3.85522	3.651	0.000324414	0.00483441	-0.0384575
ASCL1	-0.14501	4.73554	-3.65075	0.000324714	0.0048346	-0.0392991
SLFN13	0.299793	7.06711	3.6492	0.000326574	0.00485801	-0.0445063
PTPN6	-0.185384	8.07658	-3.64869	0.00032718	0.00486273	-0.0461967
HS3ST2	-0.270792	6.60034	-3.6484	0.000327539	0.00486378	-0.0471946
CD33	-0.200901	7.0786	-3.648	0.000328015	0.00486645	-0.0485192
UBE2D4	-0.122557	7.72331	-3.64777	0.000328296	0.00486645	-0.0492989
SLC38A4	-0.134362	4.41416	-3.64716	0.000329023	0.00487295	-0.0513174
PPP1R18	-0.172935	7.45898	-3.64661	0.000329692	0.00487857	-0.053167
CTNNB1	0.164719	11.209	3.64596	0.000330479	0.00488593	-0.0553414
ZNF628	-0.120783	6.43562	-3.64494	0.000331721	0.0049	-0.0587606
RPL26L1	-0.131918	7.58303	-3.64455	0.000332199	0.00490277	-0.0600737
PBXIP1	0.124964	7.6385	3.64384	0.00033306	0.00491117	-0.0624313
ASCC3	0.219066	8.33706	3.64316	0.000333903	0.00491263	-0.0647361
ELOF1	-0.122329	8.07575	-3.64305	0.000334029	0.00491263	-0.0650801
CCK	-0.230832	5.38708	-3.64305	0.000334032	0.00491263	-0.0650888
AJAP1	-0.306453	5.06056	-3.64272	0.000334432	0.00491402	-0.0661795
MAD2L1BP	-0.144274	7.20818	-3.6425	0.000334709	0.00491402	-0.066934
OSBPL6	0.275116	7.18451	3.64114	0.000336381	0.00493427	-0.0714754
HOXD1	-0.204422	6.36886	-3.64029	0.000337436	0.00494461	-0.0743295
HMGCR	-0.228602	9.13874	-3.6401	0.000337672	0.00494461	-0.0749674
RNASE3	-0.263314	5.69492	-3.63931	0.000338643	0.00495452	-0.0775825
AJUBA	-0.177532	6.99438	-3.63761	0.000340763	0.00498119	-0.0832692
FAM122B	-0.12004	6.93493	-3.63738	0.000341056	0.00498119	-0.0840546
FGD2	-0.2013	7.03149	-3.63713	0.000341359	0.0049813	-0.0848629
VPS11	-0.123464	8.22665	-3.63557	0.000343322	0.00500561	-0.0900874
IZUMO2	-0.159735	4.66635	-3.63439	0.00034481	0.00502298	-0.09403
DHRS7B	-0.112195	7.42553	-3.63315	0.000346383	0.00504123	-0.0981776
FAM134A	-0.112245	7.79852	-3.63293	0.000346661	0.00504123	-0.0989076
HCLS1	-0.202981	9.20788	-3.63263	0.000347034	0.0050423	-0.0998868
FGF1	0.174868	4.6838	3.63191	0.000347958	0.00505138	-0.102309
SRSF5	0.167856	11.7292	3.63161	0.000348341	0.00505259	-0.103312
PCMTD1	0.196286	9.76435	3.63132	0.000348711	0.00505362	-0.10428
CFD	0.278405	10.1416	3.62959	0.000350921	0.00508127	-0.110034
GEMIN8	0.156904	6.57288	3.62881	0.000351924	0.00508892	-0.112636
PPP1R7	-0.11571	8.57719	-3.62871	0.000352052	0.00508892	-0.112968
NOTCH2NL	0.244126	9.94085	3.62841	0.000352434	0.00509008	-0.113956
LOC344887	-0.245215	4.8346	-3.62645	0.000354975	0.00512239	-0.1205
SLC22A1	-0.12813	5.14958	-3.62511	0.000356714	0.00514308	-0.124951
CHD5	-0.131435	4.59239	-3.62198	0.000360817	0.0051978	-0.13537
MBD5	0.201659	6.90362	3.62048	0.000362809	0.00522204	-0.140385
SNCAIP	0.209343	6.04901	3.6184	0.000365569	0.00525728	-0.147288
LGALS12	0.190676	5.37208	3.61814	0.000365922	0.00525787	-0.148165
ZFAND5	0.200175	11.144	3.61637	0.00036829	0.0052874	-0.154041
NPCDR1	0.167134	4.91128	3.61546	0.000369519	0.00529701	-0.157075
MYO7A	-0.136571	5.68027	-3.61541	0.000369588	0.00529701	-0.157244
AAAS	-0.130056	8.06994	-3.61491	0.00037026	0.00530213	-0.158898
FNBP1L	0.254888	8.94233	3.61441	0.000370933	0.00530727	-0.160553
SH3PXD2A	0.188587	7.308	3.61398	0.000371513	0.00531106	-0.161974
ANKRD34B	-0.116334	3.17271	-3.61353	0.000372127	0.00531534	-0.16348
FAT1	0.210194	9.02062	3.61268	0.000373278	0.00532726	-0.16629
NIF3L1	-0.135118	6.70594	-3.61188	0.000374368	0.00533831	-0.168947
CCR2	-0.347049	6.08516	-3.61149	0.000374908	0.00534149	-0.170259
STC2	-0.298223	5.37857	-3.61101	0.000375564	0.00534633	-0.171852
E2F3	-0.198989	6.9175	-3.61019	0.000376683	0.00535773	-0.17456
CBFA2T3	-0.122226	6.58596	-3.60928	0.000377935	0.00537101	-0.177582
TMPRSS11F	-0.0744956	3.11317	-3.60807	0.000379599	0.00539011	-0.18158
CHD8	0.135917	8.06362	3.60766	0.000380168	0.00539365	-0.182945
S100A4	-0.254337	8.91732	-3.60698	0.00038111	0.00540247	-0.185198
TCF4	0.163509	10.1655	3.60654	0.000381727	0.00540667	-0.18667
AHCTF1	0.17155	8.66056	3.60541	0.000383296	0.00542435	-0.190405
NFATC3	-0.127774	8.7042	-3.60418	0.000385023	0.00543226	-0.194496
SRSF6	0.162965	9.57981	3.60418	0.000385024	0.00543226	-0.1945
KRT28	0.12925	3.39687	3.60417	0.000385034	0.00543226	-0.194524
OXR1	0.188293	7.60252	3.60409	0.000385144	0.00543226	-0.194783
PTPDC1	0.158646	7.01629	3.60336	0.00038617	0.00544195	-0.197207
C6orf211	-0.250106	7.94421	-3.60314	0.000386475	0.00544195	-0.197925
SYN3	-0.131846	4.95373	-3.60143	0.000388895	0.00547145	-0.203606
BACH1	-0.235999	8.16967	-3.60098	0.000389533	0.00547431	-0.205099
KCTD2	-0.0937918	7.37696	-3.60082	0.000389747	0.00547431	-0.205599
STOM	-0.160222	10.9574	-3.59941	0.000391758	0.00549797	-0.210283
RWDD2A	0.138562	6.34284	3.59845	0.000393133	0.00551268	-0.213472
WDR17	0.211583	5.34475	3.59729	0.000394791	0.00553134	-0.217304
REV1	0.143448	8.27528	3.59574	0.000397016	0.00555525	-0.222418
ITGB3	0.431739	7.33587	3.59564	0.000397157	0.00555525	-0.222741
JMY	0.199936	7.21151	3.59478	0.000398403	0.00556808	-0.225593
CDH5	-0.247005	9.0862	-3.59444	0.000398901	0.00557041	-0.226728
ZNF664	0.111683	7.8812	3.59306	0.000400902	0.00559373	-0.231283
LDHC	0.291276	3.88722	3.59153	0.000403134	0.00562023	-0.236336
ITCH	0.0942311	9.22973	3.59078	0.000404236	0.00563093	-0.238819
METTL5	-0.120926	8.82233	-3.59017	0.00040512	0.00563859	-0.240808
ASH1L	0.179864	9.24025	3.58995	0.000405455	0.0056386	-0.24156
WRN	0.169816	7.6595	3.58964	0.000405902	0.00564016	-0.242562
PTHLH	0.165221	4.91327	3.58625	0.000410926	0.00570418	-0.253756
RPL23AP53	0.174312	6.29475	3.5859	0.000411443	0.00570418	-0.254899
ARID2	0.196268	8.26935	3.58563	0.000411848	0.00570418	-0.255795
BASP1	-0.201257	8.73748	-3.58562	0.000411861	0.00570418	-0.255824
CEP72	-0.0905779	6.02364	-3.58378	0.000414626	0.00573691	-0.261912
NCSTN	-0.106462	9.28749	-3.58359	0.000414905	0.00573691	-0.262523
WIZ	-0.0988812	6.78937	-3.5803	0.000419878	0.00580092	-0.273362
LMO2	-0.130026	6.88026	-3.57993	0.000420449	0.00580405	-0.274598
MECOM	0.20925	8.70038	3.57944	0.000421184	0.00580945	-0.276188
XRN1	0.183333	8.9049	3.57778	0.000423735	0.00583345	-0.281679
STRN4	-0.11326	7.60652	-3.57765	0.000423932	0.00583345	-0.282103
C5orf64	-0.144656	4.22511	-3.57763	0.000423962	0.00583345	-0.282167
CCDC62	-0.114611	4.16077	-3.57657	0.00042559	0.00584971	-0.285653
LRRFIP2	0.132287	8.73737	3.57641	0.000425837	0.00584971	-0.286181
OR4D2	0.154263	4.34381	3.57574	0.000426874	0.00585918	-0.288393
ELOVL2	0.220844	4.7535	3.57489	0.000428178	0.00587231	-0.291168
SPZ1	0.0755559	3.51528	3.57401	0.000429544	0.00588402	-0.294064
XYLT1	-0.183593	6.57452	-3.57389	0.00042973	0.00588402	-0.294458
KAT5	-0.100249	7.9758	-3.57325	0.000430733	0.00589298	-0.29658
UBA1	-0.115367	9.58757	-3.57178	0.000433031	0.00591962	-0.301419
CADPS	0.21025	5.06091	3.5713	0.000433769	0.00592346	-0.302967
ENC1	0.242736	7.39291	3.57115	0.000434015	0.00592346	-0.303481
SLC25A2	-0.184214	5.22382	-3.57049	0.000435053	0.00593282	-0.305654
MKRN3	-0.138406	4.77536	-3.56987	0.000436027	0.00594131	-0.307688
EIF4A2	0.139909	10.2093	3.56902	0.000437365	0.00595473	-0.310475
CCDC126	-0.183876	7.54772	-3.56795	0.000439054	0.0059729	-0.313979
PTPRK	0.164373	9.47393	3.56755	0.000439697	0.00597594	-0.315311
GNGT2	-0.164134	5.25259	-3.56737	0.000439985	0.00597594	-0.315906
TMED8	-0.125934	7.45309	-3.56593	0.000442269	0.00600211	-0.320613
SH2D4B	-0.177283	4.6897	-3.5647	0.00044424	0.00602402	-0.324656
IL13	-0.265409	4.50336	-3.56433	0.000444834	0.00602612	-0.325871
LRP12	0.159777	6.94434	3.56379	0.000445692	0.00602612	-0.327624
KIFC3	-0.129825	7.34772	-3.56353	0.000446117	0.00602612	-0.328491
APBB1IP	-0.224118	7.83591	-3.56324	0.000446589	0.00602612	-0.329452
BVES	-0.185523	5.80508	-3.56313	0.000446763	0.00602612	-0.329806
RALGAPA2	0.187859	9.55317	3.56309	0.000446823	0.00602612	-0.329928
CHTOP	-0.0949132	8.0658	-3.56273	0.000447402	0.00602612	-0.331106
TAF6	-0.0986778	7.57153	-3.56265	0.000447541	0.00602612	-0.331389
NOL12	-0.133394	6.88757	-3.5626	0.00044761	0.00602612	-0.331527
TMEM216	-0.138424	6.5627	-3.56101	0.000450191	0.00605604	-0.336756
ZCCHC8	0.107726	8.0577	3.56048	0.000451054	0.00606281	-0.338497
LSM12	-0.122538	8.93459	-3.55923	0.000453084	0.00608406	-0.34258
HDAC3	-0.104807	8.2681	-3.55907	0.000453356	0.00608406	-0.343125
NRXN3	0.232125	6.57268	3.55842	0.000454418	0.00609346	-0.345251
DDR2	0.196132	8.95449	3.55752	0.000455883	0.00610825	-0.348178
SH2B3	-0.139699	7.15689	-3.55609	0.00045825	0.00613089	-0.352884
MAPRE2	-0.151174	8.26528	-3.55606	0.0004583	0.00613089	-0.352983
CBFB	0.125622	8.91633	3.55444	0.000460966	0.00616168	-0.358257
WFDC10A	-0.0990749	4.17933	-3.55271	0.000463849	0.00619531	-0.363924
TOMM20L	0.176634	5.03203	3.55216	0.000464768	0.00620267	-0.365722
DPCR1	-0.331698	5.71074	-3.55184	0.0004653	0.00620486	-0.366763
TMEM18	-0.121265	7.7038	-3.55132	0.000466179	0.00621167	-0.368477
SF3B5	-0.144767	8.54232	-3.55056	0.000467462	0.00622386	-0.370976
ZNF791	0.18929	7.91612	3.54967	0.00046895	0.00623556	-0.373865
RAPGEFL1	-0.203013	5.46896	-3.54906	0.000469976	0.00623556	-0.375851
FBP2	-0.180584	3.81899	-3.54905	0.000469995	0.00623556	-0.375887
NUBP1	-0.120396	8.51082	-3.549	0.000470084	0.00623556	-0.376058
FAM83H	-0.164603	6.48463	-3.54894	0.00047019	0.00623556	-0.376264
ZFPM2	0.228017	7.48548	3.54819	0.000471464	0.00624754	-0.378722
NME7	0.176524	7.19535	3.5457	0.0004757	0.00629825	-0.386851
CD300LF	-0.239857	6.71893	-3.54542	0.000476168	0.00629825	-0.387745
HRCT1	-0.228021	5.48563	-3.54528	0.00047641	0.00629825	-0.388207
SCAMP2	-0.130791	9.27773	-3.54506	0.000476795	0.0062984	-0.388941
URM1	-0.122514	6.89264	-3.54391	0.000478758	0.00631938	-0.392673
STRBP	0.21633	6.91963	3.54328	0.000479843	0.00632875	-0.39473
ZNF385A	-0.132036	7.27231	-3.5429	0.000480509	0.00633258	-0.39599
ZNF208	0.308125	4.95993	3.54252	0.000481153	0.00633613	-0.397209
MTF1	-0.152134	7.61779	-3.53716	0.000490504	0.00645422	-0.414696
MSX2	-0.137701	4.43747	-3.53679	0.000491163	0.00645786	-0.415915
PADI2	-0.223004	5.74825	-3.53643	0.000491793	0.00646059	-0.417079
PLEKHA1	0.196997	9.41021	3.53623	0.000492137	0.00646059	-0.417715
TTC23	0.133058	6.3417	3.53539	0.00049363	0.00647516	-0.420467
FPR3	-0.281013	7.95576	-3.53353	0.00049693	0.00651337	-0.426518
EBF3	0.302977	5.02117	3.53318	0.000497561	0.00651658	-0.427671
THOC6	-0.17851	7.47348	-3.5329	0.000498057	0.00651802	-0.428576
OBSL1	-0.106447	6.73189	-3.53231	0.000499102	0.00652663	-0.43048
LAMA1	0.109267	5.10887	3.53208	0.00049951	0.00652691	-0.431223
CYP4F12	-0.20342	5.15858	-3.5309	0.000501628	0.00654951	-0.435066
RPL23	-0.139507	7.96511	-3.53028	0.000502758	0.00655918	-0.437109
SYTL3	0.269121	8.16915	3.52931	0.000504496	0.00657678	-0.440244
SLC45A4	0.208442	6.45119	3.52806	0.000506758	0.00660116	-0.444307
LPHN1	-0.122223	7.27947	-3.52705	0.000508596	0.00661999	-0.447594
MCHR2	-0.0823553	4.05401	-3.52673	0.000509175	0.00662126	-0.448627
CCND2	0.149474	9.73092	3.52657	0.000509479	0.00662126	-0.449169
RBM26	0.145992	8.77689	3.52578	0.000510906	0.00663164	-0.45171
SCG5	0.242869	5.16429	3.5257	0.000511063	0.00663164	-0.451989
EXOSC1	-0.113634	8.25099	-3.525	0.000512344	0.00664315	-0.454262
KCNK1	0.222346	7.22435	3.52414	0.00051392	0.00665846	-0.457051
RELA	-0.160023	8.52617	-3.52365	0.000514829	0.0066626	-0.458655
CLTB	-0.139556	7.85017	-3.52354	0.000515029	0.0066626	-0.459008
YTHDF1	-0.0967996	8.96366	-3.52322	0.00051562	0.00666513	-0.46005
LYPLA2	-0.157691	7.90002	-3.52187	0.0005181	0.00669206	-0.464406
RNF19A	0.16059	9.80292	3.5194	0.000522695	0.00674625	-0.472424
LGALSL	0.28325	9.4325	3.51773	0.000525832	0.00678155	-0.477857
TMEM89	-0.156137	6.06408	-3.51715	0.000526915	0.00679032	-0.479724
MPHOSPH8	0.151432	8.51303	3.51692	0.000527344	0.00679067	-0.480464
RENBP	-0.199256	6.31627	-3.51455	0.000531826	0.00684315	-0.488146
AKR1C3	-0.248132	8.74187	-3.51416	0.000532579	0.00684762	-0.489431
GPR143	-0.140526	5.22408	-3.51373	0.000533393	0.00685286	-0.490817
YIF1A	-0.156373	8.68148	-3.5132	0.000534409	0.00685887	-0.492545
PARP12	-0.131105	8.51445	-3.51306	0.000534674	0.00685887	-0.492994
GLG1	0.109591	10.2078	3.51281	0.000535138	0.00685961	-0.493782
ORMDL2	-0.153487	8.19096	-3.51076	0.000539074	0.00690481	-0.500433
VWC2	-0.207934	5.70964	-3.51036	0.000539845	0.00690945	-0.501731
CD82	-0.200555	9.25503	-3.50832	0.000543778	0.00695451	-0.50832
FAM120AOS	-0.0959931	8.09981	-3.5079	0.000544601	0.00695975	-0.509691
ABHD4	-0.145159	7.689	-3.50476	0.00055073	0.00703276	-0.519849
GDAP2	0.113429	8.34933	3.50451	0.000551208	0.00703354	-0.520636
CHCHD7	-0.174219	6.92831	-3.50323	0.000553732	0.0070604	-0.524782
LRRC4B	-0.154151	5.3856	-3.5026	0.000554971	0.00707085	-0.526809
EMCN	-0.302418	8.89356	-3.50087	0.000558399	0.00710401	-0.532397
IMPA2	-0.176251	7.72282	-3.50086	0.000558416	0.00710401	-0.532424
KANK2	-0.172962	8.84337	-3.49895	0.000562221	0.00714703	-0.538586
UBR5	0.153283	8.82084	3.49807	0.000563983	0.00715893	-0.541426
RGS5	0.307796	10.1559	3.49806	0.000564006	0.00715893	-0.541463
TPMT	-0.181057	6.74224	-3.49751	0.000565106	0.00716392	-0.543229
FIBIN	-0.383413	8.07169	-3.49744	0.000565249	0.00716392	-0.543459
CEP192	0.165683	7.87503	3.4963	0.000567558	0.00718779	-0.547157
DDX26B	0.217523	6.94043	3.49562	0.000568929	0.00719975	-0.549348
SNAPC5	-0.100529	7.077	-3.49425	0.000571703	0.0072247	-0.55376
PTPN13	0.245531	9.94169	3.49422	0.000571757	0.0072247	-0.553846
PRCP	0.158938	10.2648	3.49278	0.000574684	0.00725223	-0.558477
SESN3	0.178685	8.32403	3.49273	0.000574796	0.00725223	-0.558654
CEP70	0.253421	8.56276	3.49141	0.000577492	0.0072808	-0.562899
PPP1R1B	-0.210064	6.11066	-3.48873	0.000583016	0.00734495	-0.571533
CST8	0.101646	3.8945	3.48823	0.000584055	0.00735255	-0.573148
SRA1	-0.110905	7.17972	-3.48675	0.00058713	0.00738576	-0.577911
OTP	-0.108262	4.27239	-3.48612	0.000588432	0.00739661	-0.57992
SRCAP	-0.14143	7.7292	-3.4857	0.000589322	0.00740229	-0.581292
FCGBP	-0.304965	6.68968	-3.48475	0.000591308	0.00741667	-0.584342
ATP5J	-0.125425	7.29857	-3.48473	0.000591347	0.00741667	-0.584401
CAPRIN2	0.155987	7.11135	3.48271	0.000595588	0.00746432	-0.590882
INGX	-0.156048	5.06859	-3.48206	0.000596972	0.00747611	-0.592987
VSIG10	-0.18665	6.4287	-3.48177	0.000597575	0.00747811	-0.593903
PF4	0.379108	6.32947	3.4804	0.000600492	0.00750904	-0.598317
HGFAC	-0.107723	4.99243	-3.47742	0.000606848	0.00757923	-0.607864
C7orf63	0.323875	6.34587	3.47735	0.000607003	0.00757923	-0.608096
AP2A2	-0.0924189	8.22008	-3.47706	0.00060764	0.00758157	-0.609048
SHC2	-0.135644	6.57642	-3.47569	0.000610581	0.00761263	-0.613425
CHUK	-0.242099	7.93682	-3.4748	0.000612507	0.007631	-0.61628
AHSP	0.245345	4.4085	3.47409	0.000614048	0.00764456	-0.618558
AGTPBP1	-0.169391	7.87121	-3.47328	0.000615816	0.00765968	-0.621164
COX7A1	-0.153406	7.36359	-3.47307	0.00061626	0.00765968	-0.621817
MAPK10	0.225933	7.48135	3.47291	0.000616625	0.00765968	-0.622354
IL4R	-0.212346	9.80557	-3.46943	0.000624252	0.00774316	-0.633498
HOXA2	-0.229379	5.86494	-3.46942	0.000624264	0.00774316	-0.633515
CD300E	-0.285848	6.43157	-3.46882	0.000625585	0.00775316	-0.635431
ESAM	-0.230137	7.71805	-3.46845	0.00062641	0.00775316	-0.636626
EEF1E1	-0.175492	6.33276	-3.46843	0.000626448	0.00775316	-0.636681
CBX8	-0.117426	5.9348	-3.4661	0.000631639	0.00781167	-0.64416
C1orf115	-0.166405	7.33105	-3.46529	0.000633431	0.0078281	-0.646728
BRIX1	-0.192387	8.005	-3.46424	0.000635786	0.00785145	-0.650091
THOC5	-0.14417	7.01227	-3.46402	0.000636297	0.00785201	-0.650819
ZFP30	0.117961	5.65393	3.46354	0.000637371	0.00785951	-0.652347
LAIR1	-0.224004	8.48982	-3.46211	0.000640593	0.00789347	-0.656916
EPHB6	-0.132798	6.09993	-3.46121	0.000642625	0.00791121	-0.659787
SS18	0.122594	8.72815	3.46106	0.00064297	0.00791121	-0.660273
DNAJB12	-0.0875048	7.39524	-3.45941	0.000646729	0.00795165	-0.665554
LRCH3	0.114429	7.86299	3.457	0.000652229	0.00801344	-0.673227
EXOSC7	0.126432	7.4932	3.45645	0.0006535	0.00802321	-0.674992
FERMT3	-0.208206	8.26077	-3.45612	0.000654257	0.00802666	-0.67604
PTH1R	-0.168758	6.07295	-3.45588	0.000654816	0.00802768	-0.676814
FCF1	-0.143823	7.46654	-3.45508	0.000656668	0.00804374	-0.679372
HOXA11	-0.0967647	4.00195	-3.45477	0.000657375	0.00804374	-0.680348
ADPRHL1	-0.117825	5.34479	-3.45469	0.000657557	0.00804374	-0.680598
FGGY	0.145227	7.36605	3.45409	0.000658962	0.00805509	-0.682532
PROCR	0.155053	6.82837	3.45369	0.000659878	0.0080564	-0.683791
HS2ST1	0.132515	8.34534	3.45358	0.000660135	0.0080564	-0.684144
BLOC1S2	-0.14673	8.03409	-3.45342	0.000660502	0.0080564	-0.684646
C16orf54	-0.167716	5.94852	-3.45302	0.000661438	0.00806199	-0.68593
ADCY1	-0.105223	5.35505	-3.45261	0.000662397	0.00806786	-0.687243
TSEN15	-0.162173	7.83124	-3.45222	0.000663296	0.00807298	-0.688471
LDOC1L	-0.138111	7.05119	-3.45151	0.000664956	0.00808734	-0.690735
TSG101	-0.0805885	9.32665	-3.45119	0.000665715	0.00808817	-0.691768
RAD51B	0.119925	6.46609	3.45092	0.000666342	0.00808817	-0.692621
RXFP1	-0.441154	5.69282	-3.45087	0.000666462	0.00808817	-0.692785
FKBP7	0.152824	6.90223	3.45053	0.00066727	0.00809215	-0.693882
CASP5	-0.252268	6.02794	-3.4501	0.000668269	0.00809323	-0.695237
SEL1L3	0.20543	9.74742	3.45008	0.000668319	0.00809323	-0.695304
THBD	-0.270807	9.32868	-3.44919	0.000670422	0.00811288	-0.698151
ZDHHC7	-0.10938	9.16348	-3.44872	0.000671535	0.00812052	-0.699653
USP13	0.248568	7.93828	3.44777	0.000673766	0.00814166	-0.702657
BRK1	-0.135222	5.97283	-3.44748	0.000674462	0.00814423	-0.703592
PARP9	-0.188227	8.93221	-3.44391	0.000682977	0.008238	-0.714955
FPR1	-0.330507	8.58695	-3.44381	0.000683204	0.008238	-0.715256
TAMM41	0.131753	7.59071	3.44216	0.000687194	0.00827939	-0.72053
FBXW11	0.0969896	8.70257	3.44198	0.000687618	0.00827939	-0.721087
PLCH1	0.238416	6.70256	3.44139	0.000689043	0.00828643	-0.722963
DGAT2	-0.18653	6.32278	-3.44133	0.000689185	0.00828643	-0.723149
TTC27	0.124235	7.36143	3.44074	0.000690624	0.00828965	-0.725038
PPP1R3E	-0.148948	6.43369	-3.44064	0.000690867	0.00828965	-0.725356
CYP26A1	-0.177954	4.45239	-3.44061	0.000690927	0.00828965	-0.725435
PSMD5	-0.1385	8.14403	-3.43976	0.000693001	0.00830862	-0.728149
NMT2	0.139323	7.1324	3.43541	0.000703649	0.00843029	-0.741955
RAB5B	-0.127257	8.85451	-3.43482	0.000705117	0.00844189	-0.743842
ZNF133	0.116154	6.79419	3.43273	0.000710299	0.00849789	-0.75047
BBS2	0.157996	8.71851	3.43158	0.000713152	0.00852598	-0.754099
CKB	0.237055	8.49882	3.43081	0.000715086	0.00854305	-0.756551
DCLK1	0.236355	6.3171	3.42913	0.000719313	0.00858746	-0.761885
ARHGAP32	0.164817	7.75606	3.42864	0.00072053	0.00859473	-0.763416
DPYSL3	0.202857	8.66849	3.42848	0.000720946	0.00859473	-0.763938
IDI1	-0.223626	9.1842	-3.42828	0.00072145	0.00859473	-0.764571
LTBP3	0.169321	8.51496	3.42792	0.000722373	0.00859628	-0.765728
WWOX	0.081798	6.87434	3.42783	0.000722599	0.00859628	-0.766011
SNAP29	-0.120589	7.44567	-3.42699	0.000724712	0.00861534	-0.768654
MAP2K4	0.127703	8.6939	3.42563	0.000728177	0.00864548	-0.772971
RHOF	-0.184642	6.61728	-3.42543	0.00072869	0.00864548	-0.773608
SLC25A35	-0.125319	5.77225	-3.42539	0.000728785	0.00864548	-0.773726
MSMO1	-0.320958	9.03417	-3.42419	0.000731837	0.00867559	-0.777509
NT5DC2	-0.174801	7.53512	-3.42361	0.000733337	0.00868726	-0.779361
SMUG1	-0.12748	6.37746	-3.42319	0.000734424	0.00869403	-0.780702
CAMK4	0.205588	5.79487	3.42241	0.000736415	0.00871148	-0.783151
SUN3	-0.119052	3.81198	-3.4213	0.000739274	0.00873918	-0.786658
KLK1	-0.233533	5.64089	-3.42052	0.000741287	0.00875684	-0.789118
RYK	0.108432	9.37844	3.4199	0.000742903	0.00876979	-0.791089
IGHMBP2	-0.092716	6.26027	-3.41962	0.000743637	0.00877232	-0.791983
ROBO4	-0.236351	8.12131	-3.41925	0.0007446	0.00877754	-0.793154
DDHD1	0.169647	7.70961	3.41828	0.000747131	0.00880122	-0.796224
DEFB127	0.126078	3.20548	3.41797	0.000747934	0.00880453	-0.797196
ATG13	-0.116953	8.11945	-3.41775	0.000748519	0.00880528	-0.797904
TRPC1	0.192959	7.09706	3.4165	0.000751771	0.00883737	-0.801826
APOM	-0.11074	5.32499	-3.41553	0.000754342	0.00886141	-0.804914
TRO	0.149481	5.99753	3.41413	0.000758023	0.00889846	-0.809319
RAB3D	-0.127664	7.18163	-3.41369	0.000759178	0.00890583	-0.810696
FCN2	-0.141811	5.63021	-3.4131	0.000760758	0.00891816	-0.812577
ZNF839	-0.106267	6.58227	-3.41263	0.000762011	0.00892664	-0.814065
TRMT1	-0.124935	7.06499	-3.41102	0.000766283	0.00897045	-0.819122
WFDC9	-0.15876	3.64875	-3.41019	0.000768517	0.00899037	-0.821756
HLA-E	-0.139215	12.1981	-3.40949	0.000770383	0.00900596	-0.82395
CPEB1	0.163145	5.22902	3.40903	0.000771626	0.00901424	-0.825408
TPI1P2	-0.110103	6.43979	-3.40849	0.000773093	0.00902512	-0.827126
DACH1	-0.238025	6.6146	-3.40795	0.00077453	0.00903565	-0.828806
FAM167B	-0.23179	6.18177	-3.40705	0.000776976	0.00905765	-0.831658
TOM1	-0.133152	8.15443	-3.40686	0.00077749	0.00905765	-0.832256
ZNF256	0.157584	6.32656	3.40526	0.000781837	0.00909996	-0.837298
RPL28	-0.0979126	8.61325	-3.40512	0.000782201	0.00909996	-0.837719
SNRPN	0.137613	8.30966	3.40491	0.000782771	0.00910032	-0.838378
SLC25A27	0.236893	7.1674	3.40357	0.000786454	0.00913685	-0.842623
CCDC51	-0.126805	5.86886	-3.40332	0.000787136	0.00913847	-0.843407
ADAM8	-0.162059	7.14692	-3.40249	0.000789406	0.00915264	-0.846011
EBP	-0.187205	7.8431	-3.40248	0.000789441	0.00915264	-0.846052
PCBD1	-0.145886	9.00371	-3.40146	0.000792225	0.00917584	-0.849235
MYPN	-0.0962556	3.75268	-3.40129	0.000792719	0.00917584	-0.849798
TMEM183B	-0.0776656	9.08279	-3.40116	0.000793074	0.00917584	-0.850203
SYBU	0.313635	7.7036	3.40044	0.000795064	0.00919255	-0.852469
HMGN1	0.11994	9.64411	3.39899	0.000799061	0.00923244	-0.857004
PIGP	-0.115931	6.698	-3.39876	0.000799714	0.00923365	-0.857742
PLVAP	0.238857	7.29779	3.39829	0.000801019	0.0092424	-0.859216
RFPL2	-0.150509	4.0331	-3.39765	0.000802794	0.00925655	-0.861218
PHKA1	0.13805	6.12262	3.39569	0.000808281	0.00931287	-0.867376
IL10	-0.242517	5.50191	-3.39552	0.000808782	0.00931287	-0.867937
EGFL6	0.344578	8.00672	3.39523	0.000809578	0.00931567	-0.868825
SRXN1	-0.218486	7.33116	-3.39487	0.000810607	0.00931769	-0.869974
SDCCAG3	-0.0963472	7.03814	-3.39468	0.000811133	0.00931769	-0.87056
ZMYND11	0.125684	8.93039	3.39416	0.000812601	0.00931769	-0.872195
TAOK1	0.129382	8.56059	3.39389	0.000813362	0.00931769	-0.873041
OAS1	-0.251862	7.84874	-3.39389	0.000813364	0.00931769	-0.873044
HLA-G	-0.146547	11.7109	-3.39381	0.000813578	0.00931769	-0.873282
PIR	-0.190085	7.25008	-3.39365	0.000814054	0.00931769	-0.87381
WNT4	0.154565	5.83877	3.3936	0.000814172	0.00931769	-0.873941
ABT1	-0.13472	6.37454	-3.39332	0.000814964	0.00932043	-0.87482
TUBB2A	-0.152318	6.95275	-3.3929	0.000816173	0.00932358	-0.87616
RNF130	-0.109524	10.0377	-3.39284	0.000816346	0.00932358	-0.876351
GPHN	0.119595	7.52182	3.39246	0.000817423	0.00932957	-0.877543
GJC3	-0.147318	4.60214	-3.39207	0.000818518	0.0093313	-0.878754
LCP2	-0.181878	9.11583	-3.39201	0.000818681	0.0093313	-0.878934
TPRG1	-0.176255	6.17084	-3.39086	0.000821966	0.00935881	-0.882553
C10orf25	-0.145722	5.38323	-3.39078	0.000822204	0.00935881	-0.882815
CC2D1A	-0.0827125	6.57879	-3.39049	0.000823021	0.0093618	-0.883713
GDF5	-0.119907	4.887	-3.38914	0.000826891	0.00939722	-0.887953
SEMA6A	-0.335114	7.73996	-3.38891	0.000827556	0.00939722	-0.88868
KLHL10	0.192179	4.04555	3.38851	0.000828701	0.00939722	-0.889929
LYRM5	-0.17946	8.15541	-3.38839	0.000829027	0.00939722	-0.890285
GCH1	-0.279327	6.86256	-3.38824	0.000829467	0.00939722	-0.890765
NEUROD1	-0.139987	4.15365	-3.38824	0.000829478	0.00939722	-0.890777
SLC17A6	-0.0922066	3.67338	-3.38689	0.000833356	0.00943482	-0.894992
CPN1	0.152169	4.11967	3.38587	0.000836324	0.00946179	-0.898205
NTAN1	-0.13371	7.69225	-3.38568	0.00083686	0.00946179	-0.898784
NES	-0.167172	7.30866	-3.38545	0.00083754	0.00946251	-0.899519
KAAG1	-0.11049	4.32013	-3.38527	0.000838046	0.00946251	-0.900064
FBXO4	-0.154648	6.80429	-3.38483	0.00083933	0.00946511	-0.901448
CSF2RB	-0.205271	7.13773	-3.38481	0.000839398	0.00946511	-0.901521
GMFG	-0.17303	9.84713	-3.38413	0.000841384	0.00948117	-0.903657
ZNF414	-0.101516	6.89026	-3.38364	0.000842789	0.0094861	-0.905165
MGST3	-0.152881	10.1755	-3.38357	0.00084301	0.0094861	-0.905401
SNRNP35	-0.108502	6.29642	-3.3834	0.000843509	0.0094861	-0.905936
PIGB	-0.18204	7.26998	-3.38218	0.00084707	0.0095198	-0.909743
CAB39	-0.159529	9.69447	-3.3816	0.000848788	0.00953276	-0.911574
BPY2B	0.0737622	3.79364	3.38093	0.00085074	0.00954832	-0.913649
U2AF1L4	-0.151824	6.58352	-3.38044	0.000852196	0.00955831	-0.915195
GJA4	-0.195032	7.22117	-3.37964	0.000854549	0.00957441	-0.917686
TM2D2	-0.125315	7.44444	-3.37946	0.000855107	0.00957441	-0.918276
RILPL2	-0.123762	8.31231	-3.37938	0.000855334	0.00957441	-0.918516
SIRPD	-0.203356	5.06746	-3.37841	0.000858218	0.00960031	-0.921557
USP19	-0.1235	7.65494	-3.37806	0.00085924	0.00960538	-0.922632
CSPP1	0.221489	7.62266	3.37776	0.000860154	0.00960693	-0.923593
CDC123	-0.117973	8.99913	-3.37761	0.000860598	0.00960693	-0.924059
ATP8B1	0.185138	8.09018	3.37744	0.000861087	0.00960693	-0.924572
TRIM8	-0.116912	9.01712	-3.37536	0.000867296	0.0096698	-0.931063
NFATC4	0.144903	6.58986	3.37472	0.000869243	0.0096801	-0.93309
RASA2	0.181262	7.84749	3.37467	0.000869367	0.0096801	-0.933218
SLITRK6	0.445192	6.12843	3.37364	0.00087248	0.00970528	-0.936447
ARHGDIA	-0.142223	8.55371	-3.37354	0.000872779	0.00970528	-0.936757
PPM1B	0.164964	8.65182	3.37222	0.00087679	0.00974346	-0.940899
LARGE	0.115197	7.42662	3.37165	0.000878519	0.00975625	-0.942678
CDC14C	-0.162132	4.5137	-3.37116	0.000879993	0.00976459	-0.944193
ZNF250	0.108973	6.79493	3.37102	0.000880428	0.00976459	-0.944639
ROBO1	0.17505	8.22878	3.37053	0.000881925	0.00977476	-0.946173
ZDHHC17	0.136244	8.32557	3.37009	0.000883257	0.0097831	-0.947537
CCL8	-0.32425	5.37483	-3.3697	0.000884437	0.00978417	-0.948743
INTS9	-0.106511	7.7736	-3.36968	0.000884514	0.00978417	-0.948821
OR2H1	0.119065	4.50714	3.36896	0.0008867	0.00980193	-0.951051
RPS6KA1	-0.143557	8.41888	-3.36828	0.000888797	0.00981867	-0.953184
APEX1	-0.116718	9.52019	-3.36685	0.000893192	0.00986077	-0.957639
CMTM5	0.289082	5.4051	3.36653	0.00089419	0.00986382	-0.958648
ZRANB3	0.132727	5.41436	3.36638	0.000894638	0.00986382	-0.9591
TMEM102	-0.158022	6.4707	-3.36616	0.000895319	0.00986448	-0.959786
GABARAP	-0.0997299	10.6164	-3.36596	0.000895945	0.00986448	-0.960418
MAP7D3	0.175571	7.02499	3.36579	0.000896452	0.00986448	-0.960929
ZMYM4	0.124044	9.2872	3.36505	0.000898751	0.00988334	-0.963242
KDM5A	0.139192	8.9021	3.36361	0.000903234	0.00992028	-0.967735
TMEM92	0.19178	6.44326	3.36359	0.000903288	0.00992028	-0.967789
CEBPE	-0.137807	5.98634	-3.36304	0.00090502	0.00993284	-0.969519
TMEM57	0.0939918	7.56935	3.36279	0.000905779	0.00993471	-0.970276
LIMD2	-0.134762	6.59455	-3.36238	0.000907072	0.00994243	-0.971565
SEPW1	0.184074	9.88939	3.36175	0.000909047	0.00995761	-0.973528
SH3BP5	-0.155686	8.48821	-3.36097	0.000911478	0.00997429	-0.97594
BPTF	0.126998	8.85745	3.36089	0.000911753	0.00997429	-0.976212
DUSP8	-0.138428	6.60233	-3.36055	0.000912812	0.00997941	-0.97726
ITGAD	-0.140037	5.27662	-3.3603	0.000913604	0.0099816	-0.978043
ZNF433	0.151854	5.86744	3.35977	0.000915255	0.00999316	-0.979673
CHD1L	0.117805	7.68797	3.35884	0.000918199	0.0100188	-0.982572
PRKCQ	0.248947	7.07493	3.358	0.00092088	0.0100345	-0.985205
GPRIN2	-0.251936	6.73981	-3.35796	0.000921002	0.0100345	-0.985325
SUPT4H1	-0.0970698	8.7765	-3.35782	0.000921421	0.0100345	-0.985735
MMP25	-0.228227	6.4213	-3.3573	0.000923085	0.0100374	-0.987364
RBBP7	0.110597	9.96014	3.35726	0.000923231	0.0100374	-0.987507
SEC24B	0.130765	9.28649	3.35718	0.00092347	0.0100374	-0.987741
AIFM2	-0.126012	6.48509	-3.35689	0.000924385	0.0100409	-0.988635
EGFL7	-0.205951	7.86619	-3.35669	0.000925025	0.0100413	-0.98926
ECHDC3	-0.155603	7.01197	-3.35626	0.000926385	0.0100496	-0.990586
PREX1	-0.205263	8.98537	-3.35558	0.000928567	0.0100648	-0.99271
AP1G2	-0.129672	7.50471	-3.35545	0.000928976	0.0100648	-0.993108
NAA16	0.155778	7.42686	3.35508	0.000930166	0.0100712	-0.994263
MAGEB18	-0.0832134	3.99795	-3.35451	0.000932006	0.0100847	-0.996047
PCGF2	-0.121815	7.26365	-3.35307	0.000936623	0.0101263	-1.00051
BPIFB3	-0.101631	4.84533	-3.35294	0.00093705	0.0101263	-1.00092
ATP6V1C2	-0.155966	4.89018	-3.35236	0.000938918	0.01014	-1.00272
KDM6A	0.169104	8.42831	3.35211	0.00093974	0.0101423	-1.00351
PPP1R12C	-0.105931	7.79461	-3.35178	0.000940785	0.0101471	-1.00451
HSP90AB3P	0.219985	8.1208	3.35075	0.000944145	0.0101769	-1.00773
C10orf54	-0.167381	7.96642	-3.35023	0.000945813	0.0101883	-1.00932
FGF14	0.296827	6.58835	3.34814	0.000952644	0.0102554	-1.01582
AGTRAP	-0.147648	7.91918	-3.34752	0.000954689	0.0102708	-1.01775
DNTTIP1	-0.10665	8.28618	-3.34596	0.000959809	0.0103193	-1.02258
TNKS	0.122697	7.86757	3.34345	0.000968118	0.010402	-1.03036
PES1	-0.151016	6.41918	-3.34251	0.000971242	0.010429	-1.03326
WWC3	-0.133045	8.94132	-3.34185	0.000973435	0.0104459	-1.0353
YKT6	-0.117921	8.93931	-3.34003	0.000979533	0.0105046	-1.04093
DECR1	0.111183	8.9626	3.3394	0.000981657	0.0105207	-1.04289
SPRYD7	-0.158449	8.28226	-3.33462	0.000997875	0.0106877	-1.05767
SECTM1	-0.212483	7.14224	-3.33385	0.00100051	0.0107092	-1.06005
SLC17A5	-0.10904	8.21935	-3.33342	0.00100197	0.0107106	-1.06137
DCTN4	-0.118301	9.13038	-3.33331	0.00100235	0.0107106	-1.06171
PNISR	0.211518	9.95827	3.33313	0.00100297	0.0107106	-1.06226
GPHB5	0.138849	5.31623	3.33307	0.00100319	0.0107106	-1.06246
C1orf50	-0.0890688	6.60075	-3.33269	0.00100448	0.0107155	-1.06362
LBR	-0.137716	9.36978	-3.33257	0.00100491	0.0107155	-1.06401
ATXN3L	0.154663	3.29502	3.33234	0.0010057	0.010717	-1.06471
PAPOLG	0.152203	8.29164	3.33178	0.00100762	0.0107288	-1.06644
MEPCE	-0.152826	7.59077	-3.33165	0.00100807	0.0107288	-1.06684
PPP1R14D	0.1398	4.61265	3.32965	0.00101501	0.0107923	-1.07302
ZPBP	0.166569	3.86689	3.32944	0.00101574	0.0107923	-1.07367
RABGAP1L	0.150103	7.82636	3.32921	0.00101654	0.0107923	-1.07439
TALDO1	-0.147396	9.44347	-3.32917	0.00101668	0.0107923	-1.07451
MED29	-0.123496	7.1598	-3.32901	0.00101723	0.0107923	-1.075
ARHGEF35	0.403341	7.17303	3.32873	0.00101819	0.0107957	-1.07585
FHOD1	-0.131997	7.61093	-3.32851	0.00101898	0.0107972	-1.07654
FGFR4	-0.240496	7.05239	-3.32675	0.00102511	0.010855	-1.08195
NOC2L	-0.153731	7.75026	-3.32658	0.00102572	0.010855	-1.08249
SIGLEC1	-0.189098	6.7888	-3.32607	0.00102752	0.0108672	-1.08407
MMP24	-0.141041	5.06812	-3.32365	0.00103604	0.0109505	-1.09152
SLC12A8	-0.156193	6.41423	-3.32276	0.00103918	0.0109758	-1.09425
ZNF322	0.180439	7.01497	3.32261	0.00103974	0.0109758	-1.09474
FBXO27	-0.12579	5.72271	-3.32232	0.00104074	0.0109796	-1.0956
PTPRJ	-0.160682	8.40302	-3.32192	0.00104219	0.0109879	-1.09685
ZNF660	0.192522	5.16386	3.32162	0.00104324	0.0109922	-1.09776
RASEF	0.262852	6.77481	3.32092	0.00104574	0.0110116	-1.09992
HCFC2	0.164715	7.73757	3.32048	0.00104732	0.0110211	-1.10128
C1orf53	-0.154627	6.14983	-3.32016	0.00104848	0.0110211	-1.10228
PPP1R17	-0.230624	5.12072	-3.32012	0.0010486	0.0110211	-1.10238
SRSF8	-0.110453	8.15563	-3.31926	0.00105169	0.0110402	-1.10503
UACA	0.245474	8.64966	3.31925	0.00105172	0.0110402	-1.10507
HIVEP1	0.191303	8.68406	3.31807	0.00105597	0.0110778	-1.1087
KLF11	-0.145952	7.81968	-3.31756	0.00105781	0.0110902	-1.11027
LSM4	-0.111393	8.71038	-3.31658	0.00106136	0.0111206	-1.11329
METTL21B	-0.11071	6.02236	-3.31606	0.00106323	0.0111332	-1.11487
CD58	-0.159991	8.50576	-3.31449	0.00106895	0.0111862	-1.11971
DIP2C	0.125793	7.4367	3.31376	0.00107161	0.011207	-1.12195
GRM8	-0.255721	4.63659	-3.31271	0.00107545	0.0112388	-1.12518
C19orf80	-0.120831	5.33619	-3.31257	0.00107598	0.0112388	-1.12562
RBM47	-0.150441	9.16641	-3.31219	0.00107734	0.0112461	-1.12676
PHF8	0.0971433	7.64823	3.31179	0.00107882	0.0112546	-1.128
CTDSP1	-0.102176	8.70504	-3.31151	0.00107984	0.0112583	-1.12885
ENDOG	-0.0996215	6.6443	-3.31106	0.00108151	0.0112635	-1.13024
NINL	0.145435	7.06335	3.31091	0.00108209	0.0112635	-1.13072
ZC3H6	0.229552	8.08744	3.31083	0.00108235	0.0112635	-1.13094
CR1	-0.325493	6.44276	-3.30964	0.00108677	0.0113025	-1.13461
MYOT	-0.131588	3.92918	-3.30793	0.00109311	0.0113615	-1.13985
EFCAB3	-0.156413	3.4098	-3.30695	0.00109676	0.0113895	-1.14286
FIGF	-0.464171	8.96762	-3.30684	0.00109716	0.0113895	-1.14318
PLD1	0.175481	7.27186	3.30566	0.00110157	0.0114282	-1.1468
PRDM12	-0.0750786	5.00806	-3.30477	0.00110492	0.0114559	-1.14953
HECW2	-0.370519	7.8046	-3.30358	0.0011094	0.0114954	-1.15319
FAM115A	0.154293	5.74626	3.30198	0.00111547	0.0115512	-1.1581
DNTT	0.0684057	3.82028	3.30016	0.00112236	0.0116154	-1.16365
NAA60	-0.113956	7.75566	-3.29905	0.00112663	0.0116524	-1.16707
TOR2A	-0.121063	5.91392	-3.29834	0.00112933	0.0116701	-1.16923
ELMO2	-0.13111	7.92829	-3.29824	0.00112972	0.0116701	-1.16954
GPR155	0.181528	7.26512	3.29783	0.00113129	0.0116791	-1.17078
SP140L	0.14812	7.00252	3.29628	0.00113726	0.0117336	-1.17553
ATP5H	-0.109838	10.0471	-3.29528	0.00114115	0.0117666	-1.1786
CIT	0.275571	6.95321	3.29338	0.00114851	0.0118352	-1.18439
INF2	-0.128513	7.35302	-3.29089	0.00115824	0.0119282	-1.19199
ALKBH6	-0.119779	7.27987	-3.28921	0.00116486	0.011989	-1.19712
ABCG2	0.292211	7.03401	3.28834	0.00116833	0.0120174	-1.1998
FKBP1A	-0.140837	7.94265	-3.28801	0.00116961	0.0120232	-1.20078
SLC39A13	-0.134253	8.2155	-3.28729	0.00117248	0.0120335	-1.20299
SPHKAP	-0.162514	4.04131	-3.28727	0.00117255	0.0120335	-1.20305
KHDRBS3	-0.150052	7.28192	-3.28701	0.0011736	0.0120335	-1.20385
SREBF1	-0.125368	7.57234	-3.28698	0.00117371	0.0120335	-1.20394
C7orf43	-0.177136	6.76124	-3.28686	0.00117417	0.0120335	-1.20429
RAPGEF1	-0.124168	8.5411	-3.28591	0.00117799	0.0120653	-1.20722
VIPR2	0.159281	4.80795	3.28512	0.00118115	0.0120851	-1.20963
CDKL1	0.136593	6.17045	3.28498	0.00118168	0.0120851	-1.21003
OLFM4	-0.420992	4.42551	-3.28488	0.00118208	0.0120851	-1.21033
EPHA3	0.272829	6.35511	3.28465	0.00118302	0.0120874	-1.21105
RFX7	0.231882	7.7847	3.28437	0.00118413	0.0120915	-1.2119
MGAT4B	-0.122514	7.44307	-3.28384	0.00118626	0.0120987	-1.21352
DCLK3	-0.12911	4.06581	-3.28384	0.00118627	0.0120987	-1.21352
CCAR1	0.161041	9.13022	3.28328	0.00118852	0.0121143	-1.21523
NAALADL1	-0.1072	5.5788	-3.28261	0.00119122	0.0121345	-1.21727
HNRNPCL1	-0.193742	4.39477	-3.28125	0.0011967	0.0121829	-1.2214
ANKRD26	0.203988	6.34112	3.28098	0.00119779	0.0121867	-1.22222
ZNF365	-0.1218	5.01093	-3.28048	0.00119983	0.0122	-1.22375
GYG1	-0.152962	8.8722	-3.28014	0.00120121	0.0122068	-1.22479
HERC2P4	0.259028	8.94435	3.27991	0.00120215	0.012209	-1.22549
FAM86C2P	-0.135632	5.71856	-3.27963	0.00120327	0.012213	-1.22633
GAB1	-0.10511	5.69522	-3.27901	0.00120582	0.0122217	-1.22824
KCNH4	-0.093668	5.28822	-3.27899	0.00120591	0.0122217	-1.2283
MPEG1	-0.23137	8.79191	-3.27889	0.0012063	0.0122217	-1.22859
ADRA1D	-0.130363	5.99691	-3.27852	0.0012078	0.0122295	-1.22971
GPR98	0.253344	6.86544	3.27787	0.00121044	0.0122439	-1.23168
FZR1	0.115397	6.94301	3.27782	0.00121067	0.0122439	-1.23185
NPBWR2	0.150726	4.56251	3.27629	0.00121694	0.0122999	-1.2365
CDCA8	0.128824	5.6176	3.27528	0.00122112	0.0123348	-1.23958
GPRASP2	0.131051	6.44593	3.27412	0.0012259	0.0123756	-1.2431
PLP2	-0.16848	9.79891	-3.27388	0.0012269	0.0123756	-1.24383
PHF20	0.142701	7.85467	3.27377	0.00122736	0.0123756	-1.24417
TCEA1	0.106347	9.46111	3.27342	0.00122881	0.0123828	-1.24523
GOPC	0.117711	8.36074	3.27288	0.00123106	0.012398	-1.24688
SNIP1	-0.138042	7.07377	-3.2725	0.00123263	0.0124065	-1.24803
HEXDC	-0.0922352	6.68995	-3.27122	0.00123798	0.0124528	-1.25192
MRVI1	0.241837	7.15652	3.27104	0.00123871	0.0124528	-1.25246
ZNF573	0.179663	6.48848	3.27025	0.00124204	0.0124788	-1.25487
PLA2R1	0.166676	6.56992	3.26996	0.00124324	0.0124835	-1.25574
GPR82	-0.152364	3.55816	-3.26892	0.0012476	0.012518	-1.25889
ZNF649	0.15141	6.89497	3.26879	0.00124817	0.012518	-1.2593
ZNF345	0.263665	6.05743	3.26811	0.00125102	0.0125392	-1.26135
FMR1	0.12703	8.21053	3.26738	0.00125409	0.0125625	-1.26356
CECR6	-0.138612	5.98148	-3.26681	0.00125653	0.012573	-1.2653
AFG3L1P	-0.110713	6.59923	-3.26661	0.00125735	0.012573	-1.26589
TMX2	-0.119893	8.28064	-3.26661	0.00125738	0.012573	-1.26591
PDC	0.126858	3.49017	3.26637	0.0012584	0.0125758	-1.26664
RHOBTB1	0.254875	7.27794	3.26612	0.00125945	0.0125772	-1.26739
STARD3NL	-0.136491	8.36421	-3.26598	0.00126003	0.0125772	-1.26781
TMEM80	-0.149908	7.79258	-3.26547	0.00126219	0.0125833	-1.26935
CHRNA1	-0.113342	4.62163	-3.26537	0.00126263	0.0125833	-1.26967
PDE5A	0.317309	8.47383	3.26531	0.00126288	0.0125833	-1.26984
THUMPD1	0.143056	7.97975	3.26374	0.00126956	0.0126393	-1.27459
ECHDC2	0.156262	8.37517	3.26364	0.00127	0.0126393	-1.2749
C20orf27	-0.148799	5.80013	-3.26187	0.00127762	0.0127077	-1.28028
TMEM40	0.222101	5.67969	3.26146	0.00127936	0.0127175	-1.2815
TTTY8	0.0888044	4.14228	3.26069	0.00128268	0.0127429	-1.28383
KIAA1654	-0.122714	5.5946	-3.25953	0.00128771	0.0127854	-1.28736
KCTD15	-0.125114	6.82304	-3.25858	0.00129182	0.0128186	-1.29022
LTB4R	-0.102567	6.08712	-3.25747	0.00129666	0.0128591	-1.29358
GHITM	-0.10966	9.46646	-3.25635	0.00130154	0.0128999	-1.29696
C5orf42	0.165587	7.87239	3.25604	0.00130291	0.012906	-1.29791
TAAR9	-0.105813	3.82326	-3.25471	0.00130876	0.0129563	-1.30194
SERPINB12	-0.133637	3.0153	-3.25438	0.00131023	0.0129632	-1.30295
KIAA1244	0.220742	8.08225	3.25345	0.0013143	0.0129959	-1.30574
TWF2	-0.142968	8.24858	-3.25205	0.0013205	0.0130495	-1.30997
CXCL14	0.400964	7.90026	3.25135	0.00132361	0.0130726	-1.31208
PLEK2	0.131493	6.01064	3.25096	0.00132537	0.0130824	-1.31328
ANXA3	-0.305869	9.9069	-3.25039	0.00132788	0.0130994	-1.31498
TPD52L3	-0.088597	3.58742	-3.25006	0.00132935	0.0131062	-1.31597
ATXN2L	-0.107676	7.88469	-3.24977	0.00133066	0.0131116	-1.31686
CNTF	-0.146392	6.16572	-3.24882	0.00133489	0.0131389	-1.31971
SRF	-0.144491	8.29828	-3.2486	0.00133589	0.0131389	-1.32039
GTF2I	0.119786	9.3936	3.24855	0.00133613	0.0131389	-1.32055
SEC63	0.111243	10.6742	3.24845	0.00133655	0.0131389	-1.32083
CSGALNACT2	-0.184404	8.97357	-3.24819	0.00133772	0.0131427	-1.32162
KCNK6	-0.122391	6.99987	-3.2477	0.00133992	0.013151	-1.32309
FBXO42	0.148587	8.1797	3.24766	0.00134012	0.013151	-1.32323
TBXAS1	-0.157154	8.14336	-3.24743	0.00134117	0.0131536	-1.32393
DLK1	-0.15489	5.17217	-3.24712	0.00134253	0.0131593	-1.32484
STX2	0.247405	8.44021	3.24666	0.00134465	0.0131724	-1.32626
CA12	0.265278	6.18155	3.24632	0.00134616	0.0131795	-1.32727
ARL6IP6	-0.159035	7.26815	-3.24582	0.00134841	0.0131939	-1.32877
INHBC	0.121474	5.00274	3.24537	0.00135046	0.0132063	-1.33014
MAN2A2	-0.10577	8.45034	-3.24423	0.00135562	0.0132491	-1.33356
UPK3A	-0.150665	4.96239	-3.24201	0.00136575	0.0133404	-1.34026
ZNF619	-0.128192	5.84828	-3.24056	0.0013724	0.0133975	-1.34462
TNFAIP8L2	-0.150832	6.22016	-3.24001	0.00137492	0.0134144	-1.34627
PRKCI	0.201406	8.92699	3.23746	0.00138673	0.0135152	-1.35396
TAAR2	0.137285	4.13359	3.23743	0.00138686	0.0135152	-1.35404
SERPINE2	0.330531	7.08364	3.2364	0.00139164	0.0135447	-1.35713
THAP5	-0.14554	6.37838	-3.23638	0.00139177	0.0135447	-1.35722
DIS3L2	0.109945	7.6058	3.23626	0.00139229	0.0135447	-1.35756
PSD4	-0.123738	7.0764	-3.23545	0.00139611	0.0135741	-1.36002
MOCS3	-0.124283	6.18319	-3.2351	0.00139771	0.0135818	-1.36105
SLC35G5	0.145523	4.56008	3.23491	0.00139864	0.013583	-1.36164
HSPB1	0.173879	11.0523	3.23439	0.00140104	0.0135985	-1.36319
JMJD4	-0.109682	6.28868	-3.23397	0.00140302	0.0136099	-1.36445
PPIC	0.168873	8.98683	3.23322	0.00140656	0.0136267	-1.36672
PIP5KL1	-0.118516	5.48409	-3.23322	0.00140656	0.0136267	-1.36672
ASCC1	-0.119071	7.53352	-3.23309	0.00140718	0.0136267	-1.36711
TCEAL5	0.0929874	5.44796	3.23105	0.0014168	0.013712	-1.37323
TAF1	0.128807	8.05483	3.23075	0.0014182	0.0137177	-1.37412
CORO1A	-0.234487	8.84525	-3.22977	0.00142287	0.0137549	-1.37707
OGDH	-0.124588	9.19393	-3.22878	0.00142758	0.0137877	-1.38004
EEPD1	-0.139748	5.90605	-3.22871	0.00142789	0.0137877	-1.38024
HCAR2	0.269234	6.11229	3.22789	0.00143185	0.013818	-1.38272
PRSS8	0.244574	7.97535	3.22717	0.00143529	0.0138433	-1.38488
CC2D1B	-0.104603	6.91825	-3.22628	0.00143957	0.0138767	-1.38756
ZFYVE9	0.161832	6.50566	3.22572	0.00144225	0.0138946	-1.38923
STK32A	0.231076	5.68625	3.22356	0.00145269	0.0139872	-1.39571
HIF3A	-0.292882	6.97307	-3.2231	0.00145489	0.0140003	-1.39706
SPATS2L	0.103531	9.66958	3.22258	0.00145742	0.0140167	-1.39862
ALAD	-0.083665	6.94921	-3.22109	0.00146469	0.0140686	-1.40309
ADH5	-0.140633	8.94185	-3.22103	0.001465	0.0140686	-1.40328
ZNF264	0.114091	8.04844	3.22096	0.00146532	0.0140686	-1.40348
RASGRF2	0.253068	6.46537	3.22018	0.00146914	0.0140972	-1.40582
NRSN2	-0.188605	6.47778	-3.21984	0.00147082	0.0141054	-1.40684
MLST8	-0.121171	7.05788	-3.21889	0.0014755	0.0141422	-1.40969
SCYL1	-0.0987202	8.67967	-3.21816	0.00147905	0.0141681	-1.41185
CNKSR3	0.269136	7.40118	3.21755	0.00148209	0.0141892	-1.4137
LINC00476	-0.116451	6.01031	-3.21687	0.00148543	0.0142131	-1.41572
PRR13	-0.100991	9.3495	-3.21641	0.00148772	0.014227	-1.4171
TREX2	-0.124648	5.45202	-3.21446	0.00149742	0.0143116	-1.42293
POU5F1	0.169645	6.17501	3.2142	0.00149873	0.0143124	-1.42372
C9orf89	-0.109262	7.44721	-3.2141	0.0014992	0.0143124	-1.424
MMP26	-0.0776531	3.33485	-3.21339	0.00150275	0.0143382	-1.42613
APAF1	0.127139	7.80202	3.21293	0.00150506	0.0143521	-1.4275
PPP2R1B	0.0860627	8.25048	3.21231	0.00150816	0.0143692	-1.42935
C2orf27A	0.10597	6.41681	3.21223	0.00150855	0.0143692	-1.42959
IL12RB2	0.229793	5.04219	3.21156	0.00151193	0.0143932	-1.43159
CHST2	-0.176803	7.27258	-3.21072	0.00151619	0.0144256	-1.43412
TP53RK	-0.104172	6.42169	-3.21038	0.00151791	0.0144336	-1.43514
C11orf57	0.137519	6.65255	3.21021	0.00151874	0.0144336	-1.43563
LRRC1	0.183076	7.67552	3.20962	0.00152172	0.0144537	-1.43738
DMRTA1	-0.120508	5.67245	-3.2077	0.00153149	0.0145355	-1.44313
HDHD1	-0.138509	7.20557	-3.20759	0.00153205	0.0145355	-1.44346
TRIB2	-0.145735	7.65767	-3.20686	0.00153578	0.0145621	-1.44564
SCRT1	-0.105093	5.10894	-3.2067	0.00153658	0.0145621	-1.44611
AMZ1	-0.252585	5.58703	-3.20598	0.00154025	0.0145887	-1.44825
ZBED5	0.119053	8.08532	3.2044	0.00154837	0.0146574	-1.45297
PLEKHA4	-0.129304	7.02136	-3.20395	0.00155065	0.0146708	-1.45429
SIGLEC9	-0.221455	6.38782	-3.20367	0.0015521	0.0146762	-1.45513
ACSM5	-0.161688	5.38126	-3.20292	0.00155597	0.0147037	-1.45736
ANP32D	0.131185	4.57816	3.20277	0.00155675	0.0147037	-1.45781
STAB2	0.223031	5.43173	3.20165	0.00156258	0.0147505	-1.46117
PSG5	0.129842	4.28776	3.20118	0.00156502	0.0147653	-1.46257
S100A5	0.195491	4.86037	3.19996	0.00157134	0.0148166	-1.46618
NAA35	0.104389	8.87727	3.19979	0.00157223	0.0148168	-1.46669
GRK6	-0.13054	7.9593	-3.19927	0.00157495	0.0148341	-1.46824
CTRL	-0.104812	5.7033	-3.19685	0.00158765	0.0149453	-1.47545
GGTLC2	-0.182286	7.31299	-3.1964	0.00159001	0.0149592	-1.47678
OR7E24	-0.110382	4.89908	-3.19576	0.00159337	0.0149824	-1.47867
CTAGE7P	-0.132733	4.32095	-3.19546	0.00159497	0.0149891	-1.47957
HLA-DPB2	0.149437	5.82628	3.19483	0.00159829	0.0150078	-1.48144
FNBP4	0.156723	9.15983	3.19467	0.00159916	0.0150078	-1.48193
MSRB2	0.131111	9.14759	3.19458	0.00159962	0.0150078	-1.48218
TBRG4	-0.12723	6.58326	-3.19399	0.00160276	0.0150289	-1.48395
ZNF83	0.231289	8.50513	3.19315	0.00160722	0.0150623	-1.48644
TTC39B	0.161367	7.38742	3.19289	0.00160863	0.0150672	-1.48722
CUX1	-0.0812144	8.29229	-3.19229	0.00161182	0.0150887	-1.489
APBA1	0.111408	5.26629	3.19182	0.00161433	0.0151038	-1.4904
SMARCA1	0.178867	9.24203	3.19124	0.00161744	0.0151245	-1.49212
ZDHHC4	-0.0946748	8.55191	-3.19088	0.00161934	0.0151283	-1.49317
SERPINA3	-0.423527	9.28796	-3.19083	0.00161964	0.0151283	-1.49334
HIST3H3	-0.114982	6.51673	-3.19066	0.00162055	0.0151285	-1.49385
PALM3	0.305416	6.22176	3.19021	0.00162295	0.0151424	-1.49517
TTYH3	-0.186659	7.25576	-3.18997	0.00162426	0.0151463	-1.49589
RBM33	0.118432	7.66303	3.18931	0.00162782	0.0151682	-1.49786
ZNF737	0.296749	7.40129	3.1892	0.0016284	0.0151682	-1.49818
BHMT	-0.111539	4.4191	-3.18727	0.00163879	0.0152565	-1.50388
RWDD1	-0.130786	8.45549	-3.18687	0.00164097	0.0152665	-1.50508
EHD2	-0.130157	8.5262	-3.18674	0.00164167	0.0152665	-1.50546
IRF8	-0.178438	8.42703	-3.18645	0.00164325	0.0152686	-1.50632
XKRX	-0.259686	5.7915	-3.18637	0.00164371	0.0152686	-1.50657
BMP3	0.271582	6.81256	3.18461	0.00165327	0.0153439	-1.51177
RWDD4	-0.147957	7.31517	-3.18455	0.00165364	0.0153439	-1.51197
KLF12	0.170037	7.68294	3.18373	0.00165809	0.0153768	-1.51438
GLT8D2	0.257949	7.75279	3.18308	0.00166169	0.0154017	-1.51632
MCF2L2	0.0692336	4.54375	3.18226	0.00166618	0.0154348	-1.51874
ZFYVE19	0.114801	6.78754	3.18185	0.00166845	0.0154465	-1.51996
PGM5	0.218266	6.85877	3.1817	0.00166928	0.0154465	-1.52041
AKAP13	0.183555	10.5771	3.18011	0.00167805	0.0155192	-1.52511
THOC1	0.152241	7.81663	3.1776	0.00169199	0.0156396	-1.53253
TRAF6	0.0995229	8.25784	3.17686	0.00169615	0.0156612	-1.53473
ANKS1B	0.104753	4.72277	3.17685	0.00169619	0.0156612	-1.53475
CCT8	0.125245	8.08615	3.17476	0.00170793	0.015761	-1.54093
RNF180	0.177456	7.67117	3.17416	0.00171133	0.0157837	-1.54271
ATP13A2	-0.12299	7.01258	-3.17393	0.00171263	0.0157871	-1.54339
FZD3	0.197402	6.19508	3.1736	0.00171447	0.0157955	-1.54436
MS4A6E	-0.292848	4.15374	-3.1732	0.00171672	0.0157961	-1.54553
EBLN2	0.164623	6.74925	3.17301	0.00171783	0.0157961	-1.54611
DMD	0.181828	7.0156	3.17289	0.00171848	0.0157961	-1.54645
SNX20	-0.133403	5.20281	-3.17286	0.0017187	0.0157961	-1.54656
RNASE6	-0.211229	7.925	-3.17276	0.00171923	0.0157961	-1.54684
ADAP2	-0.210818	7.91654	-3.17226	0.00172205	0.0158135	-1.54831
GAPT	-0.258496	5.89383	-3.17168	0.00172535	0.0158351	-1.55003
FGFRL1	-0.0868253	6.49351	-3.17121	0.00172801	0.0158478	-1.55141
TRPM1	-0.158147	4.34435	-3.17096	0.00172944	0.0158478	-1.55215
TTC14	0.137765	7.79306	3.17093	0.00172963	0.0158478	-1.55225
DCAF5	0.0697748	9.27818	3.17078	0.00173049	0.0158478	-1.55269
ZNF689	-0.108356	6.46145	-3.1699	0.00173551	0.0158851	-1.55529
KIAA1407	0.213128	6.32387	3.16862	0.00174283	0.0159435	-1.55906
GPR97	-0.274966	5.91923	-3.16765	0.00174842	0.015986	-1.56193
BAIAP2L2	-0.120173	5.56342	-3.16672	0.00175375	0.016026	-1.56465
ZDHHC3	0.157907	7.48288	3.16622	0.00175666	0.0160433	-1.56614
GDI1	-0.104667	9.86406	-3.16607	0.00175755	0.0160433	-1.56659
PHF13	0.118205	6.83796	3.16573	0.00175948	0.0160523	-1.56758
RBP1	0.196993	6.66745	3.16482	0.00176478	0.016092	-1.57027
CKLF	-0.149765	6.88982	-3.16398	0.00176966	0.0161195	-1.57275
NPL	-0.244228	7.64026	-3.16397	0.00176972	0.0161195	-1.57277
MCOLN1	-0.177525	8.09592	-3.16351	0.00177239	0.0161352	-1.57413
TRPM2	-0.135434	5.98849	-3.16269	0.00177717	0.0161673	-1.57654
IL17D	-0.142418	6.64073	-3.16258	0.00177784	0.0161673	-1.57688
RBM8A	-0.118093	7.40959	-3.16163	0.0017834	0.0162067	-1.57968
JARID2	0.126918	8.00204	3.16135	0.00178503	0.0162067	-1.58049
PRKD3	0.127955	6.6226	3.16135	0.00178505	0.0162067	-1.5805
ZNF713	0.180481	6.33764	3.16112	0.00178636	0.0162099	-1.58116
STX10	-0.14316	7.99868	-3.16008	0.00179246	0.0162565	-1.58422
FLJ30064	-0.203828	6.67835	-3.15947	0.00179606	0.0162743	-1.58601
RAB23	0.189462	7.52257	3.1594	0.0017965	0.0162743	-1.58623
TOMM22	-0.125965	7.37662	-3.15926	0.00179733	0.0162743	-1.58664
HECA	-0.125789	8.00722	-3.1567	0.00181252	0.0164031	-1.59418
HCG27	-0.16491	5.95981	-3.15631	0.00181481	0.016415	-1.59531
PITPNA	-0.091438	9.67649	-3.15448	0.00182578	0.0164932	-1.60071
CA8	0.143951	5.2299	3.15447	0.00182579	0.0164932	-1.60071
ACTA1	-0.184646	6.15128	-3.15438	0.00182638	0.0164932	-1.601
PPIA	-0.0935373	11.8491	-3.1542	0.00182741	0.0164936	-1.60151
EHF	0.3253	8.20771	3.15329	0.00183288	0.0165342	-1.60419
PSG4	-0.0874436	4.85396	-3.15295	0.00183497	0.0165442	-1.6052
DMRTC2	-0.10161	4.87751	-3.15173	0.00184227	0.0166011	-1.60876
BLOC1S1	-0.136962	7.56701	-3.15146	0.00184395	0.0166073	-1.60957
ALDH7A1	0.148129	8.59274	3.15083	0.00184772	0.0166324	-1.6114
FLRT1	-0.139044	5.07534	-3.14949	0.00185588	0.016697	-1.61535
CEP57	0.187767	7.53639	3.14629	0.00187543	0.0168639	-1.62473
MDM4	0.115074	8.44337	3.14591	0.00187776	0.0168759	-1.62584
ABLIM3	0.159606	8.15268	3.14491	0.00188391	0.0169198	-1.62877
CHAF1B	-0.121596	5.94008	-3.14479	0.00188466	0.0169198	-1.62913
SLC14A1	-0.236134	4.96019	-3.14446	0.00188668	0.016929	-1.63009
KRTAP1-1	-0.0903013	5.96373	-3.14415	0.00188859	0.0169334	-1.63099
TMBIM6	-0.0845295	12.2762	-3.14406	0.00188918	0.0169334	-1.63127
FRMPD3	0.121762	4.88133	3.14359	0.00189206	0.0169438	-1.63263
TSSC1	-0.104895	6.96734	-3.1435	0.00189262	0.0169438	-1.6329
IFT20	0.109557	7.7495	3.14338	0.00189335	0.0169438	-1.63325
PPTC7	0.127285	8.87878	3.14298	0.00189588	0.0169574	-1.63444
MGRN1	-0.0931352	8.15272	-3.14255	0.00189852	0.0169719	-1.63568
FAM65A	-0.145216	7.55063	-3.14239	0.00189951	0.0169719	-1.63615
ZSCAN1	-0.12991	5.86632	-3.14178	0.00190329	0.0169966	-1.63793
DDX20	-0.126896	6.98157	-3.14144	0.00190546	0.0170069	-1.63895
ITGAL	-0.239559	7.25277	-3.14097	0.00190835	0.0170237	-1.6403
MESDC1	-0.128068	7.7017	-3.14064	0.00191046	0.0170336	-1.64129
FOXRED1	-0.140673	6.2663	-3.13976	0.00191596	0.0170736	-1.64387
NAB1	0.1207	7.25214	3.13958	0.00191704	0.0170742	-1.64437
MYBPH	-0.210946	5.94523	-3.13883	0.00192176	0.0171072	-1.64657
PDGFB	-0.1889	6.64619	-3.13797	0.00192717	0.0171463	-1.64909
DUSP12	-0.102683	7.15835	-3.13748	0.00193026	0.0171648	-1.65052
NEK1	0.141897	7.27417	3.13676	0.00193482	0.0171891	-1.65263
INSM2	-0.0779646	4.8047	-3.13672	0.00193504	0.0171891	-1.65273
CEP68	0.137866	6.7763	3.13638	0.00193724	0.0171996	-1.65375
ZNF295-AS1	0.188489	4.07072	3.13515	0.00194502	0.0172597	-1.65734
CTDSPL2	0.113165	8.62164	3.13443	0.00194958	0.017291	-1.65943
CHN1	0.206038	9.03609	3.1341	0.0019517	0.0173007	-1.66041
PTGDR2	-0.178743	6.19491	-3.13329	0.00195687	0.0173374	-1.66277
SLC35B1	-0.141225	8.77175	-3.13149	0.00196838	0.0174302	-1.66802
PMM1	0.193644	7.78132	3.13123	0.00197004	0.0174358	-1.66877
USP48	0.112973	8.41145	3.13075	0.00197313	0.0174539	-1.67017
LMBR1	0.115593	8.74847	3.13046	0.001975	0.0174613	-1.67102
DCTN6	-0.107961	7.87044	-3.1267	0.00199938	0.0176677	-1.682
XAGE-4	0.192564	4.46873	3.12633	0.00200178	0.0176706	-1.68307
ZNF329	0.120463	5.97372	3.12633	0.00200181	0.0176706	-1.68309
PPP1R14A	-0.189158	8.21589	-3.12594	0.00200436	0.0176769	-1.68422
GGTA1P	0.21842	7.30638	3.1259	0.00200462	0.0176769	-1.68434
ZNF417	0.208592	6.41117	3.12572	0.00200574	0.0176776	-1.68484
NFXL1	0.163528	7.10246	3.1236	0.00201963	0.0177907	-1.69101
MYL10	-0.0973081	4.05268	-3.12278	0.00202506	0.0178129	-1.69341
SLC22A7	0.102881	4.84095	3.12265	0.00202595	0.0178129	-1.6938
HLTF	0.192395	7.73067	3.12255	0.00202658	0.0178129	-1.69408
MEX3C	0.150524	7.93112	3.12248	0.00202706	0.0178129	-1.69429
CYP2C18	0.244375	4.95125	3.12232	0.00202809	0.0178129	-1.69475
MTCH2	-0.125027	9.46757	-3.12226	0.00202849	0.0178129	-1.69492
MGA	0.110222	7.79281	3.12192	0.00203074	0.0178234	-1.69591
MRPL37	-0.0985847	8.6333	-3.12052	0.00204004	0.0178957	-1.7
FUT7	-0.134661	5.14517	-3.11918	0.00204892	0.0179643	-1.70389
SCIN	0.211924	6.34138	3.11758	0.00205964	0.0180489	-1.70855
SEZ6L2	0.164149	6.62632	3.11712	0.00206272	0.0180665	-1.70989
MSH6	0.108085	7.94711	3.11598	0.00207033	0.0181237	-1.71318
AMDHD2	-0.0942815	6.80181	-3.11562	0.00207274	0.0181354	-1.71422
AIM1L	-0.133836	5.54654	-3.11388	0.00208455	0.0182293	-1.7193
ESR2	0.201966	4.79633	3.11321	0.00208907	0.0182594	-1.72124
CREM	0.163021	6.21707	3.11142	0.00210123	0.0183561	-1.72642
RUNX2	0.155627	6.43157	3.11064	0.00210654	0.018393	-1.72868
CXCR4	0.258145	10.6319	3.11025	0.00210924	0.018407	-1.72982
TTLL3	0.229082	7.841	3.10952	0.00211427	0.0184412	-1.73195
ZNF384	-0.0928512	5.81561	-3.10936	0.00211534	0.0184412	-1.7324
MED12L	0.112227	4.30797	3.10819	0.00212338	0.0185017	-1.73579
ARRDC3	0.184051	10.4969	3.10752	0.00212798	0.0185322	-1.73773
SLC2A10	-0.142061	6.99009	-3.10667	0.00213391	0.0185743	-1.74022
COX7B	-0.176582	7.36852	-3.10597	0.00213872	0.0186029	-1.74223
RARA	-0.140059	7.37166	-3.10587	0.00213941	0.0186029	-1.74251
BMP6	0.264024	8.03679	3.10508	0.00214489	0.018641	-1.7448
DERL2	-0.098634	9.0526	-3.10471	0.00214746	0.018651	-1.74587
IQGAP2	0.239976	8.24836	3.10444	0.00214935	0.018651	-1.74666
NPR3	-0.402941	7.2383	-3.10444	0.00214936	0.018651	-1.74666
FARP2	0.104001	7.23458	3.10324	0.00215774	0.0187141	-1.75014
SIM1	0.0853244	4.12147	3.10168	0.00216868	0.0187993	-1.75466
SRI	0.137538	9.55726	3.10133	0.00217115	0.0188072	-1.75567
SERPING1	-0.159502	10.7572	-3.10123	0.00217183	0.0188072	-1.75595
OSTM1	-0.138819	7.59469	-3.10071	0.00217547	0.0188291	-1.75745
ATP5J2	-0.124332	8.82618	-3.10021	0.00217899	0.0188455	-1.75889
RBM17	-0.107748	8.3958	-3.10003	0.00218027	0.0188455	-1.75942
EIF3C	0.128121	10.9256	3.09997	0.00218071	0.0188455	-1.7596
FILIP1	0.179121	8.34112	3.09931	0.00218538	0.0188762	-1.76151
BICC1	0.230452	7.51133	3.09904	0.00218726	0.0188771	-1.76228
ZNF582	-0.122243	5.25837	-3.09898	0.00218773	0.0188771	-1.76247
NTRK1	0.103801	5.63383	3.09757	0.00219773	0.0189537	-1.76654
TDP2	-0.158125	9.1327	-3.09739	0.00219896	0.0189546	-1.76704
CRYBB1	-0.100778	5.33046	-3.09708	0.00220117	0.018964	-1.76794
IL1R2	-0.550965	8.02919	-3.0967	0.0022039	0.0189778	-1.76905
CCS	0.117789	7.33109	3.09645	0.00220567	0.0189834	-1.76976
AVIL	-0.177273	6.53135	-3.09627	0.00220694	0.0189846	-1.77028
ASF1A	-0.163415	7.66479	-3.0959	0.00220961	0.0189979	-1.77136
UPF3B	0.144428	6.6982	3.09456	0.00221923	0.0190709	-1.77524
SEMA4A	-0.188042	7.41249	-3.09414	0.00222224	0.0190807	-1.77645
FAHD1	-0.109639	6.34054	-3.09408	0.00222263	0.0190807	-1.77661
DES	0.309148	9.35757	3.0934	0.00222753	0.019104	-1.77857
CORO2A	0.143759	7.0489	3.09339	0.00222765	0.019104	-1.77862
MEOX1	0.289199	5.77261	3.09323	0.00222875	0.019104	-1.77906
KRTAP3-2	-0.0828072	4.14343	-3.09179	0.00223917	0.0191836	-1.78323
CPT1B	-0.131141	6.98251	-3.09053	0.00224828	0.0192519	-1.78685
OGN	0.391191	8.58257	3.09032	0.00224983	0.0192554	-1.78747
AKAP5	0.169468	4.60694	3.08825	0.00226494	0.0193749	-1.79344
GPR20	-0.159354	6.35984	-3.0872	0.0022726	0.0194305	-1.79646
HOPX	-0.237068	8.51609	-3.08681	0.00227543	0.0194449	-1.79757
NBPF9	0.177944	12.5478	3.08641	0.00227836	0.0194552	-1.79872
RNF181	-0.117026	8.64271	-3.08633	0.00227894	0.0194552	-1.79895
FAM47B	0.079178	4.25923	3.08583	0.00228263	0.0194738	-1.80039
RRP36	-0.094502	7.00721	-3.08572	0.00228344	0.0194738	-1.80071
UBE3A	0.106615	8.74616	3.08517	0.00228754	0.019499	-1.80231
EHD3	-0.164993	6.41091	-3.08483	0.00229	0.0195101	-1.80327
LCP1	-0.189883	11.4319	-3.08451	0.00229237	0.0195204	-1.80419
OR1N2	0.137685	4.1963	3.08376	0.00229794	0.0195462	-1.80636
DNASE2B	-0.312902	5.00485	-3.0837	0.00229838	0.0195462	-1.80653
TNP2	-0.143127	4.49538	-3.08351	0.00229982	0.0195462	-1.80709
CNTLN	0.18963	6.76872	3.08348	0.00230003	0.0195462	-1.80717
GYPC	-0.162832	7.69064	-3.08287	0.00230454	0.0195747	-1.80892
ME1	-0.202229	7.74464	-3.08216	0.00230979	0.0196094	-1.81095
COL15A1	0.36792	7.32638	3.08112	0.00231754	0.0196621	-1.81394
PLA2G12A	0.087703	7.66958	3.08102	0.00231833	0.0196621	-1.81424
LINC00282	-0.0898138	4.61043	-3.08067	0.00232092	0.0196622	-1.81524
ECEL1	-0.177428	5.10799	-3.08067	0.00232096	0.0196622	-1.81525
TSSK3	0.104854	4.99058	3.08046	0.00232253	0.0196622	-1.81586
SP3P	-0.0944469	5.43179	-3.08039	0.002323	0.0196622	-1.81604
YWHAE	-0.0864309	10.5893	-3.08008	0.00232535	0.0196686	-1.81694
NRM	-0.131533	6.18222	-3.07998	0.0023261	0.0196686	-1.81723
SPDYA	-0.217021	3.84918	-3.07932	0.00233108	0.0197009	-1.81914
SLC4A2	-0.115999	7.36301	-3.07833	0.00233847	0.0197534	-1.82196
HLF	0.309612	8.42336	3.07793	0.00234153	0.0197694	-1.82313
JOSD1	-0.159495	9.16727	-3.07715	0.00234737	0.0198088	-1.82535
[truncated: 14,870 more rows]
